# Supplementary material for: Predicting the risk of mechanical complications in acute myocardial infarction using an interpretable machine learning model
Source: Research Square preprint supplement (doi:10.21203/rs.3.rs-8461400/v1), 2026-01-22
Supplement: Supplementary file 1 [file e7142797cdf7ad84f50e89cf.docx]

**Supplementary Material**

**Supplementary Table S1** Comparison of clinical characteristics between patients with and without mechanical complications in the derivation cohort

**Supplementary Table S2** Performance of LightGBM models with different number of features for mechanical complications prediction.

**Supplementary Figure S1** Decision analysis curves of the LightGBM model with different features.

**Supplementary Figure S2** P-R curves of LightGBM model with different features.

**Supplementary Figure S3** Calibration curve for the 13-feature LightGBM model.

**Supplementary Figure S4** Brier scores for LightGBM model with different number of features.

**Supplementary Figure S5** Prediction performance of the final LightGBM model with 13 features in cross validation.

| **Variables** | **mechanical complications (n=239)** | **Non-mechanical complications (n=611)** | ***P* value** |
| --- | --- | --- | --- |

| Age, year | 73(66.5,79) | 64(53.5,71) | ＜0.001 |
| --- | --- | --- | --- |
| Sex, n (%)  Male  Female | 94(39.33)  145(60.67%) | 424(69.39%)  187(30.61%) | ＜0.001 |
| Body weight, kg | 63(52,70) | 70(60,75) | ＜0.001 |
| Category of AMI, n (%)  STEMI  NSTEMI | 206(86.19%)  33(13.81%) | 433(70.87%)  178(29.13%) | ＜0.001 |
| Location of myocardial infarction n (%)  Anterior wall,  Inferior wall,  posterior wall  lateral wall, | 128(53.56%)  81(33.89%)  21(8.79%)  8(3.35%) | 207(33.88%)  215(35.19%)  3(0.49%)  13(2.13%) | ＜0.001  0.782  ＜0.001  0.433 |
| ICM, n (%) | 6(2.51%) | 16(2.62%) | 0.97 |
| MA, n (%) | 83(34.73%) | 51(8.35%) | ＜0.001 |
| Killip classification, n (%)  I  II  III  IV | 17(7.11%)  47(19.67%)  49(20.5%)  71(29.71%) | 99(16.2%)  110(18.0%)  64(10.47%)  16(2.62%) | ＜0.001 |
| SBP, mmHg | 117(99.5,140) | 133(117,151.5) | ＜0.001 |
| HR, beats/min | 86(70,105.5) | 80(68,91.5) | ＜0.001 |
| History of CHD, n (%) | 36(15.06%) | 189(30.93%) | ＜0.001 |
| History of OMI, n (%) | 13(5.44%) | 67(10.97%) | 0.0188 |
| History of HTN, n (%) | 136(56.9%) | 310(50.74%) | 0.123 |
| History of DM, n (%) | 86(35.98%) | 182(29.79%) | 0.096 |
| History of HLP, n (%) | 67(28.03%) | 81(13.26%) | ＜0.001 |
| History of HF, n (%) | 15(6.28%) | 37(6.06%) | 0.96 |
| History of tumor, n (%) | 15(6.28%) | 16(2.62%) | 0.0186 |
| History of CLD, n (%) | 67(28.03%) | 15(2.45%) | ＜0.001 |
| History of RI, n (%) | 60(25.1%) | 27(4.42%) | ＜0.001 |
| Thyroid disease, n (%) | 21(8.79%) | 28(4.58%) | 0.0278 |
| Cerebrovascular disease, n (%)  cerebral infarction  cerebral hemorrhage | 70(29.29%)  3(1.26%) | 157(25.7%)  6(0.98%) | 0.52 |
| smoking history, n (%) | 156(65.27%) | 295(48.28%) | ＜0.001 |
| drinking history, n (%) | 134(56.07%) | 114(18.66%) | ＜0.001 |
| LAD, mm  LVDd, mm  IVSd, mm  LVEF, %  mitral E peak, m/s  mitral A peak, m/s | 37(34.5,40)  49(45,52)  9.5(8.7,10.2)  46(39.75,54)  0.7(0.51,0.91)  0.81(0.69,0.94) | 36(34,39)  48(45.25,52)  9.9(9.1,10.6)  50(43.5,58)  0.6(0.48,0.75)  0.78(0.65,0.89) | 0.007  0.402  ＜0.001  ＜0.001  ＜0.001  ＜0.001 |
| T3  T4  TSH | 2.17(1.87,2.71)  1.14(1.02,1.33)  1.38(0.7,2.51) | 2.36(2.09,2.62)  1.06(0.95,1.23)  1.02(0.57,1.83) | 0.027  0.0018  0.016 |
| CHOL, mmol/L  TG, mmol/L  HDL, mmol/L  Lpa, mg/L | 4.54(3.74,5.09)  1.35(1.01,1.69)  1.05(0.84,1.28)  187.05(103,341.65) | 4.7(4.11,5.59)  1.47(1.11,2.28)  1.07(0.91,1.26)  157.07(77,331.11) | 0.009  0.0017  0.355  0.208 |
| PT, sec  APTT, sec  FIB, g/L  TT, sec  D-Dimer, mg/L | 12.6(11.8,13.9)  28.7(25.6,31.1)  3.78(2.79,4.85)  16.6(15.6,17.7)  1.42(0.77,3.36) | 11.4(11,12)  27.3(25.7,29.6)  3.24(2.65,4.06)  17.6(16.9,18.4)  0.4(0.23,0.82) | ＜0.001  0.006  ＜0.001  ＜0.001  ＜0.001 |
| ALT, U/L  BUN, mmol/L  UA, μmol/L | 47(27.7,96)  7.95(5.69,12.66)  358.65(288.4,492.6) | 37.5(24.2,62.33)  5.85(4.52,7.45)  324.05(269.1,408.63) | ＜0.001  ＜0.001  ＜0.001 |
| NEUT, 109/L  LYMPH, 109/L  MONO, 109/L  HGB, g/L  PLT, 109/L  MPV, fl | 10.28(7.86,13.33)  1.33(1.02,1.9)  0.69(0.47,0.99)  131(117.75,145.25)  213(174.75,269.25)  10.25(9.12,10.91) | 6.8(5.05,8.89)  1.69(1.21,2.17)  0.7(0.54,0.93)  137(123.5,150)  213(178,252)  10.4(9.9,11) | ＜0.001  ＜0.001  0.576  ＜0.001  0.767  ＜0.001 |
| cTNI, ng/L | 15836.29(4843.68,41984.4) | 5971.3(738.85,31033.3) | ＜0.001 |
| LDH, IU/L | 761(555.9,1187) | 579(341.35,877.45) | ＜0.001 |
| NT-proBNP, pg/mL | 4467(1947,9143.5) | 1662(775.9,3863) | ＜0.001 |
| hsCRP, mg/L  GLU, mmol/L | 44.9(15.8,87)  9.35(7.58,14.36) | 7.81(2.89,20)  8.05(6.51,11.28) | ＜0.001  ＜0.001 |
| Na, mmol/L  K, mmol/L  Ca, mmol/L  Mg, mmol/L | 137.1(133.6,140.22)  4.13(3.8,4.61)  2.17(2.08,2.3)  0.89(0.82,0.98) | 139.1(136.95,141.1)  4.05(3.79,4.36)  2.32(2.23,2.41)  0.87(0.82,0.92) | ＜0.001  0.015  ＜0.001  ＜0.001 |
| Time from onset to visit,h | 9(5,24) | 7(4,22) | 0.062 |
| Antiplatelet therapy  SAPT (%)  DAPT (%)  GPI (%)  Nonoral anticoagulants (%)  ACEI/ARB/ARNI (%)  β-blockers (%)  MRA (%)  SGLT2i (%)  thrombolytic therapy, n(%）  PCI (%)  No or only angiography  Coronary stenting  PTCA or thrombus aspiration  Stent+PTCA+thrombus aspiration  IABP | 4(1.67%)  219(91.63%)  28(11.72%)  166(69.46%)  44(18.41%)  69(28.87%)  51(21.34%)  31(12.97%)  9(3.77%)  180(75.31%)  21(8.79%)  21(8.79%)  17(7.11%)  5(2.09%) | 19(3.11%)  583(95.42%)  264(43.21)  534(87.4%)  287(46.97%)  382(62.52%)  248(40.59%)  217(35.52%)  9(1.47%)  176(28.81%)  216(35.35%)  75(12.27%)  144(23.57%)  14(2.29%) | ＜0.001  ＜0.001  ＜0.001  ＜0.001  ＜0.001  ＜0.001  ＜0.001  0.0684  ＜0.001  0.96 |

**Supplementary Table S1** Comparison of clinical characteristics between patients with and without mechanical complications in the derivation cohort

| **Feature numbers** | **AUC** | **Accuracy** | **Sensitivity** | **Specificity** | **PPV** | **NPV** | **F1** |
| --- | --- | --- | --- | --- | --- | --- | --- |
| 58  53  48  43  38  33  28  23  18  16  15  14  13  12  11  10  8  3 | 0.9622  0.9650  0.9671  0.9671  0.9602  0.9647  0.9617  0.9597  0.9625  0.9603  0.9576  0.9592  0.9587  0.9545  0.9545  0.9482  0.9329  0.8896 | 0.9137  0.9098  0.9137  0.9020  0.8863  0.9176  0.902  0.902  0.898  0.898  0.902  0.898  0.898  0.8902  0.8902  0.8824  0.8706  0.8392 | 0.8194  0.8056  0.8194  0.8056  0.7500  0.8194  0.7917  0.7917  0.7917  0.7778  0.7917  0.7917  0.7779  0.7778  0.7778  0.7222  0.7083  0.5556 | 0.9508  0.9508  0.9508  0.9399  0.9399  0.9563  0.9454  0.9454  0.9399  0.9454  0.9454  0.9399  0.9454  0.9344  0.9344  0.9454  0.9344  0.9508 | 0.8676  0.8657  0.8676  0.8406  0.8308  0.8806  0.8507  0.8507  0.8382  0.8485  0.8507  0.8382  0.8485  0.8235  0.8235  0.8387  0.8095  0.8163 | 0.9305  0.9255  0.9305  0.9247  0.9053  0.9309  0.9202  0.9202  0.9198  0.9153  0.9202  0.9198  0.9153  0.9144  0.9144  0.8964  0.8906  0.8447 | 0.8429  0.8345  0.8429  0.8227  0.7883  0.8489  0.8201  0.8201  0.8143  0.8116  0.8201  0.8143  0.8116  0.8000  0.8000  0.7761  0.7556  0.6612 |

**Supplementary Table S2** Performance of LightGBM models with different number of features for mechanical complications prediction.





**Supplementary Figure S1** Decision analysis curves of the LightGBM model with different features.

| 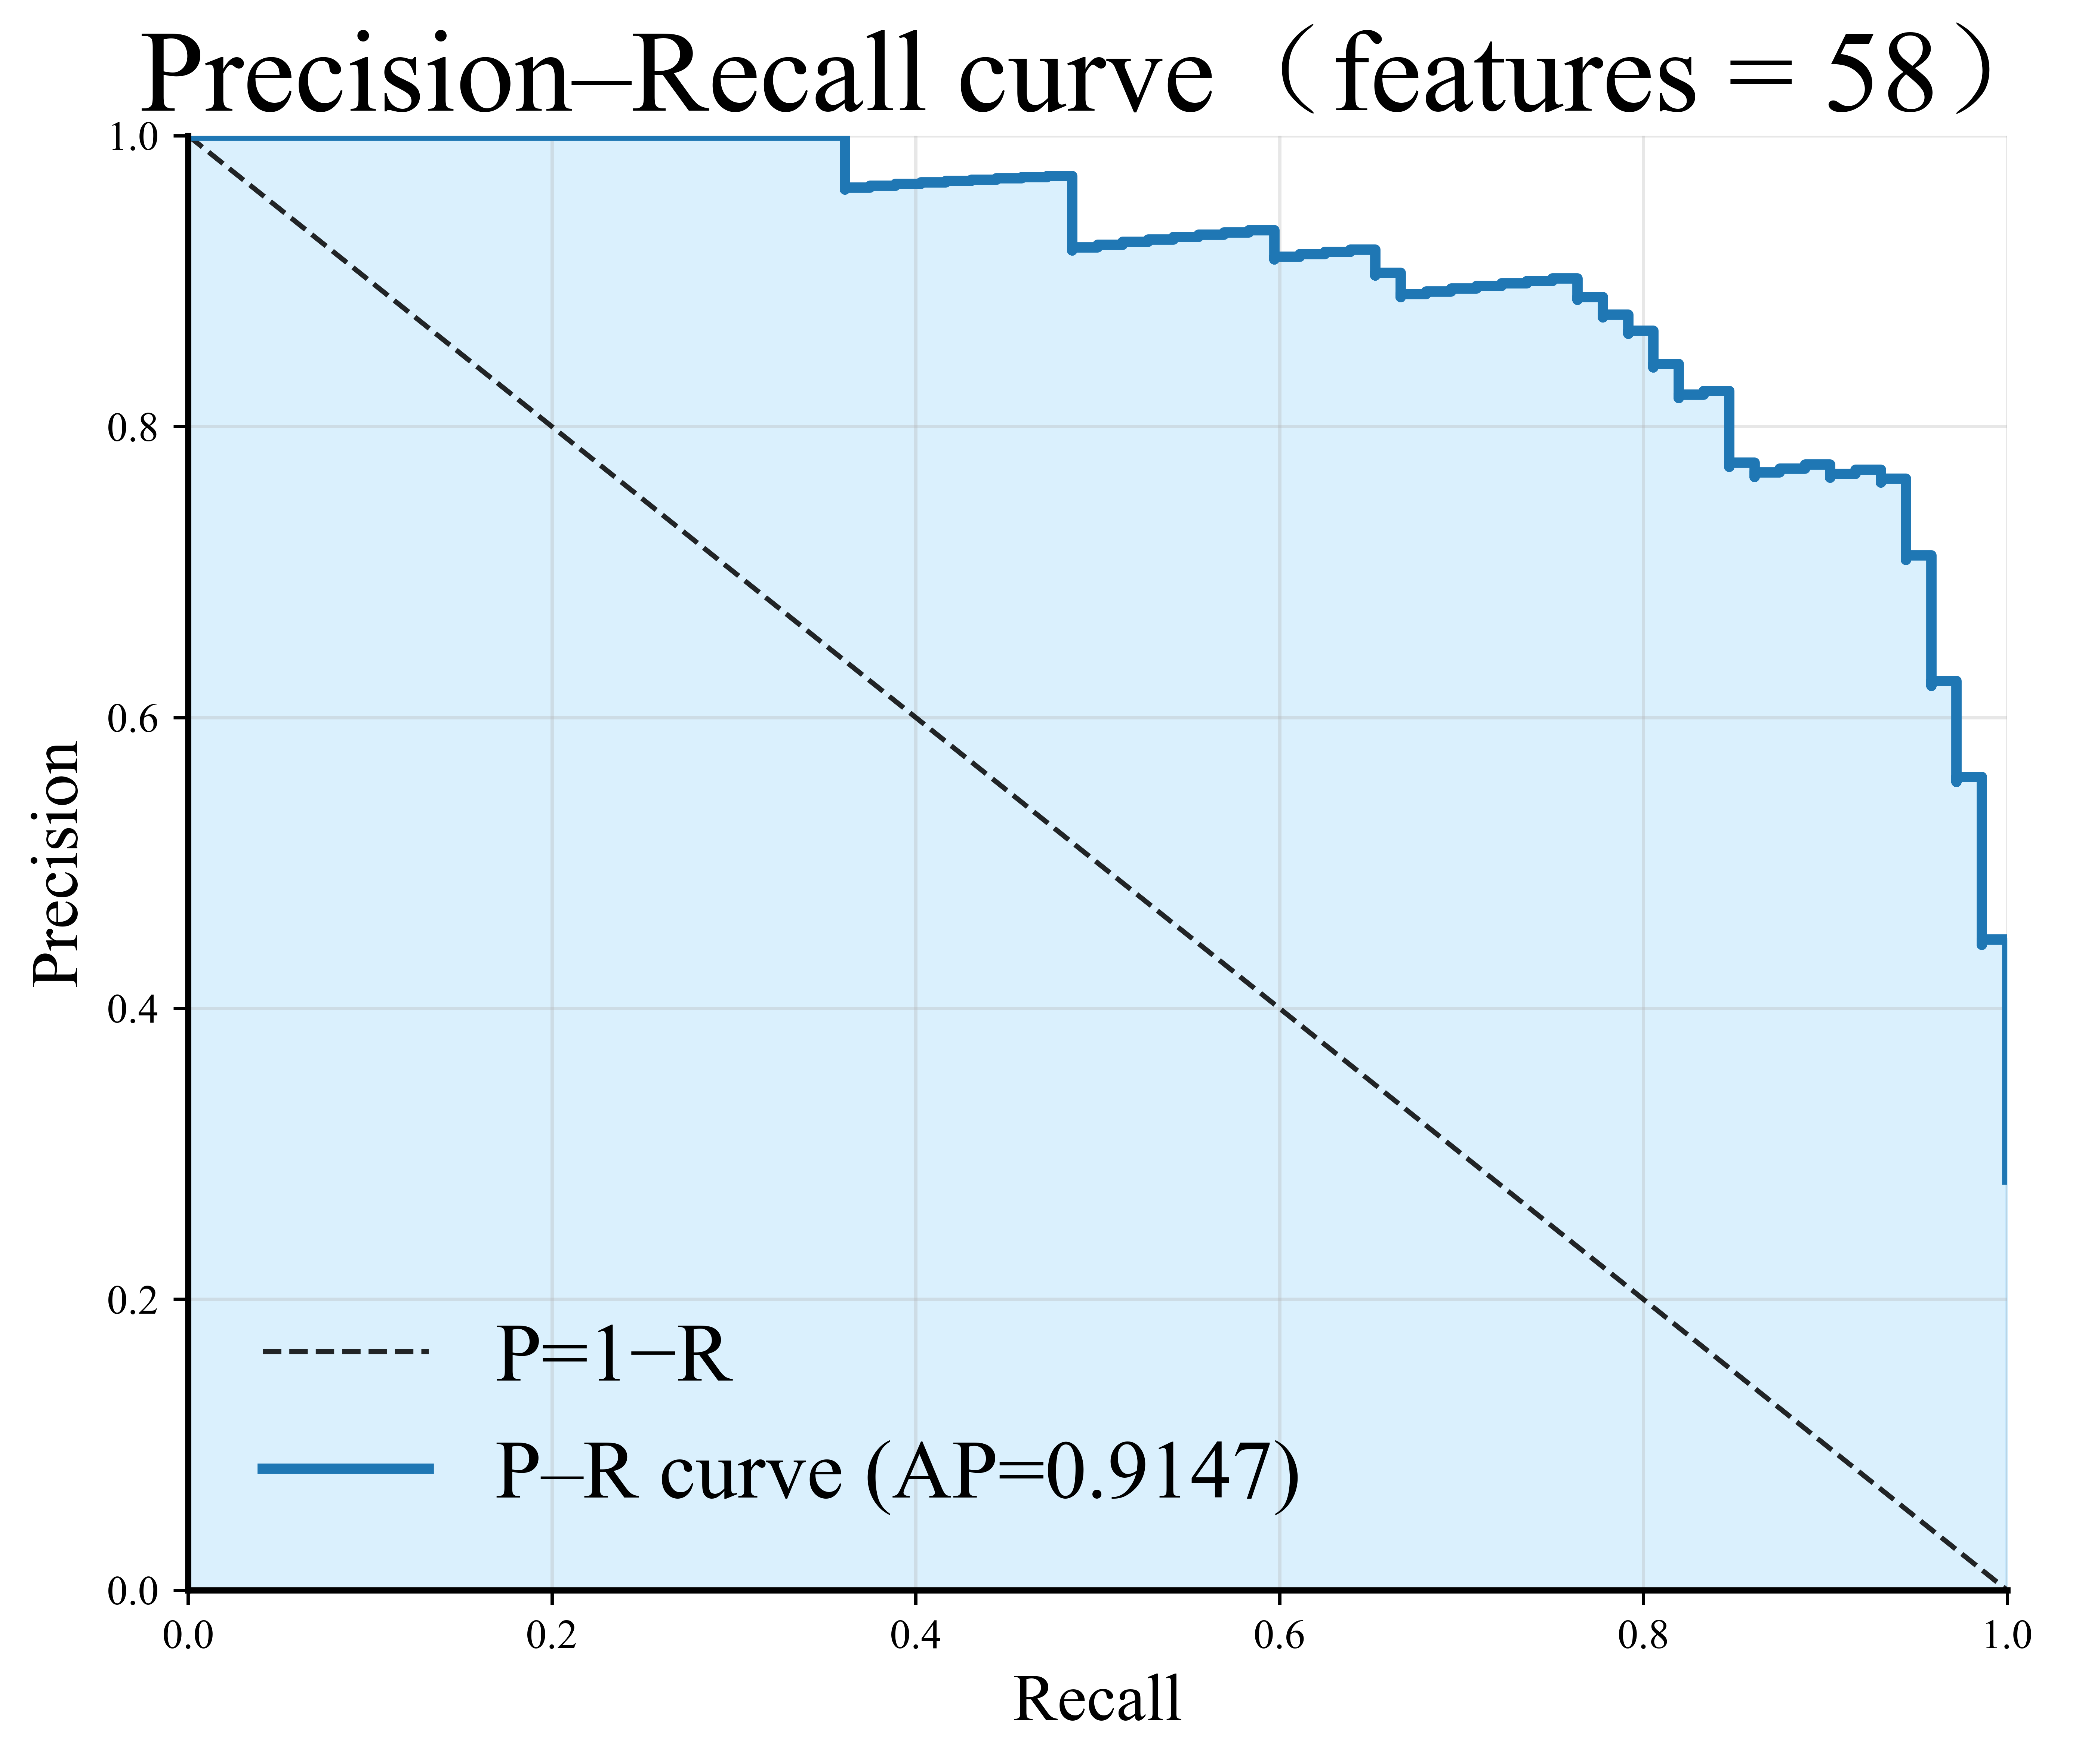 | 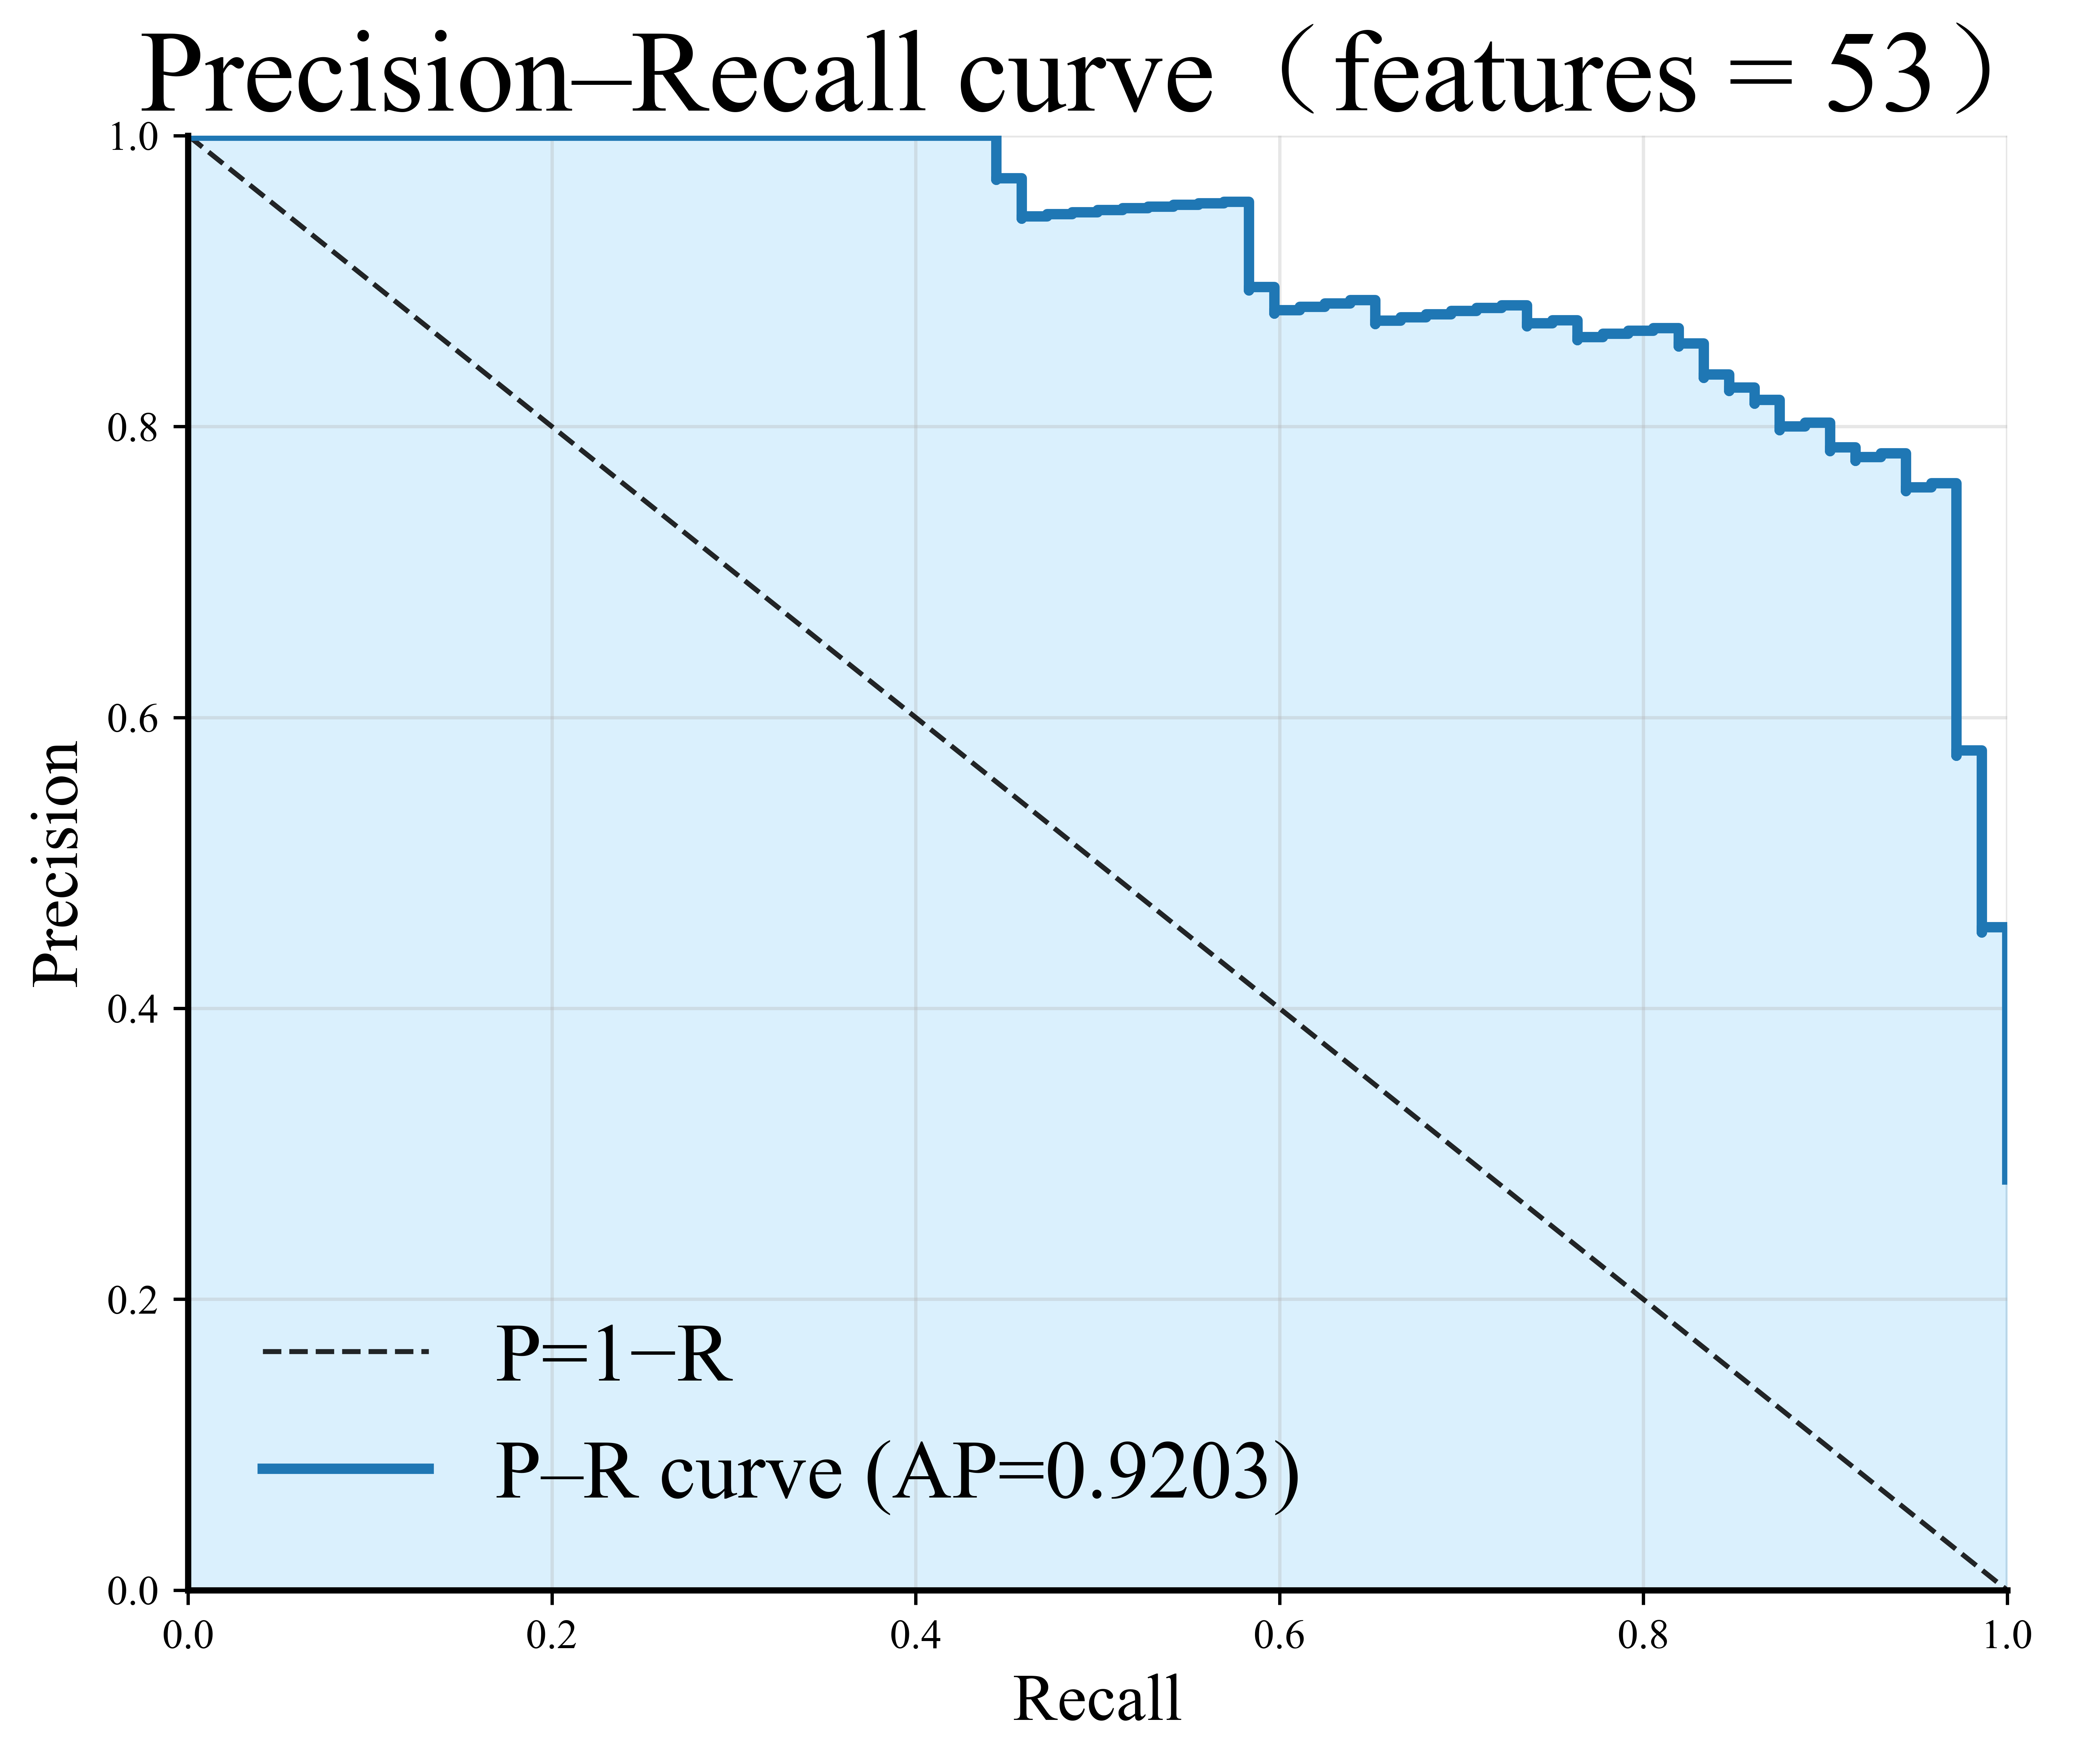 | 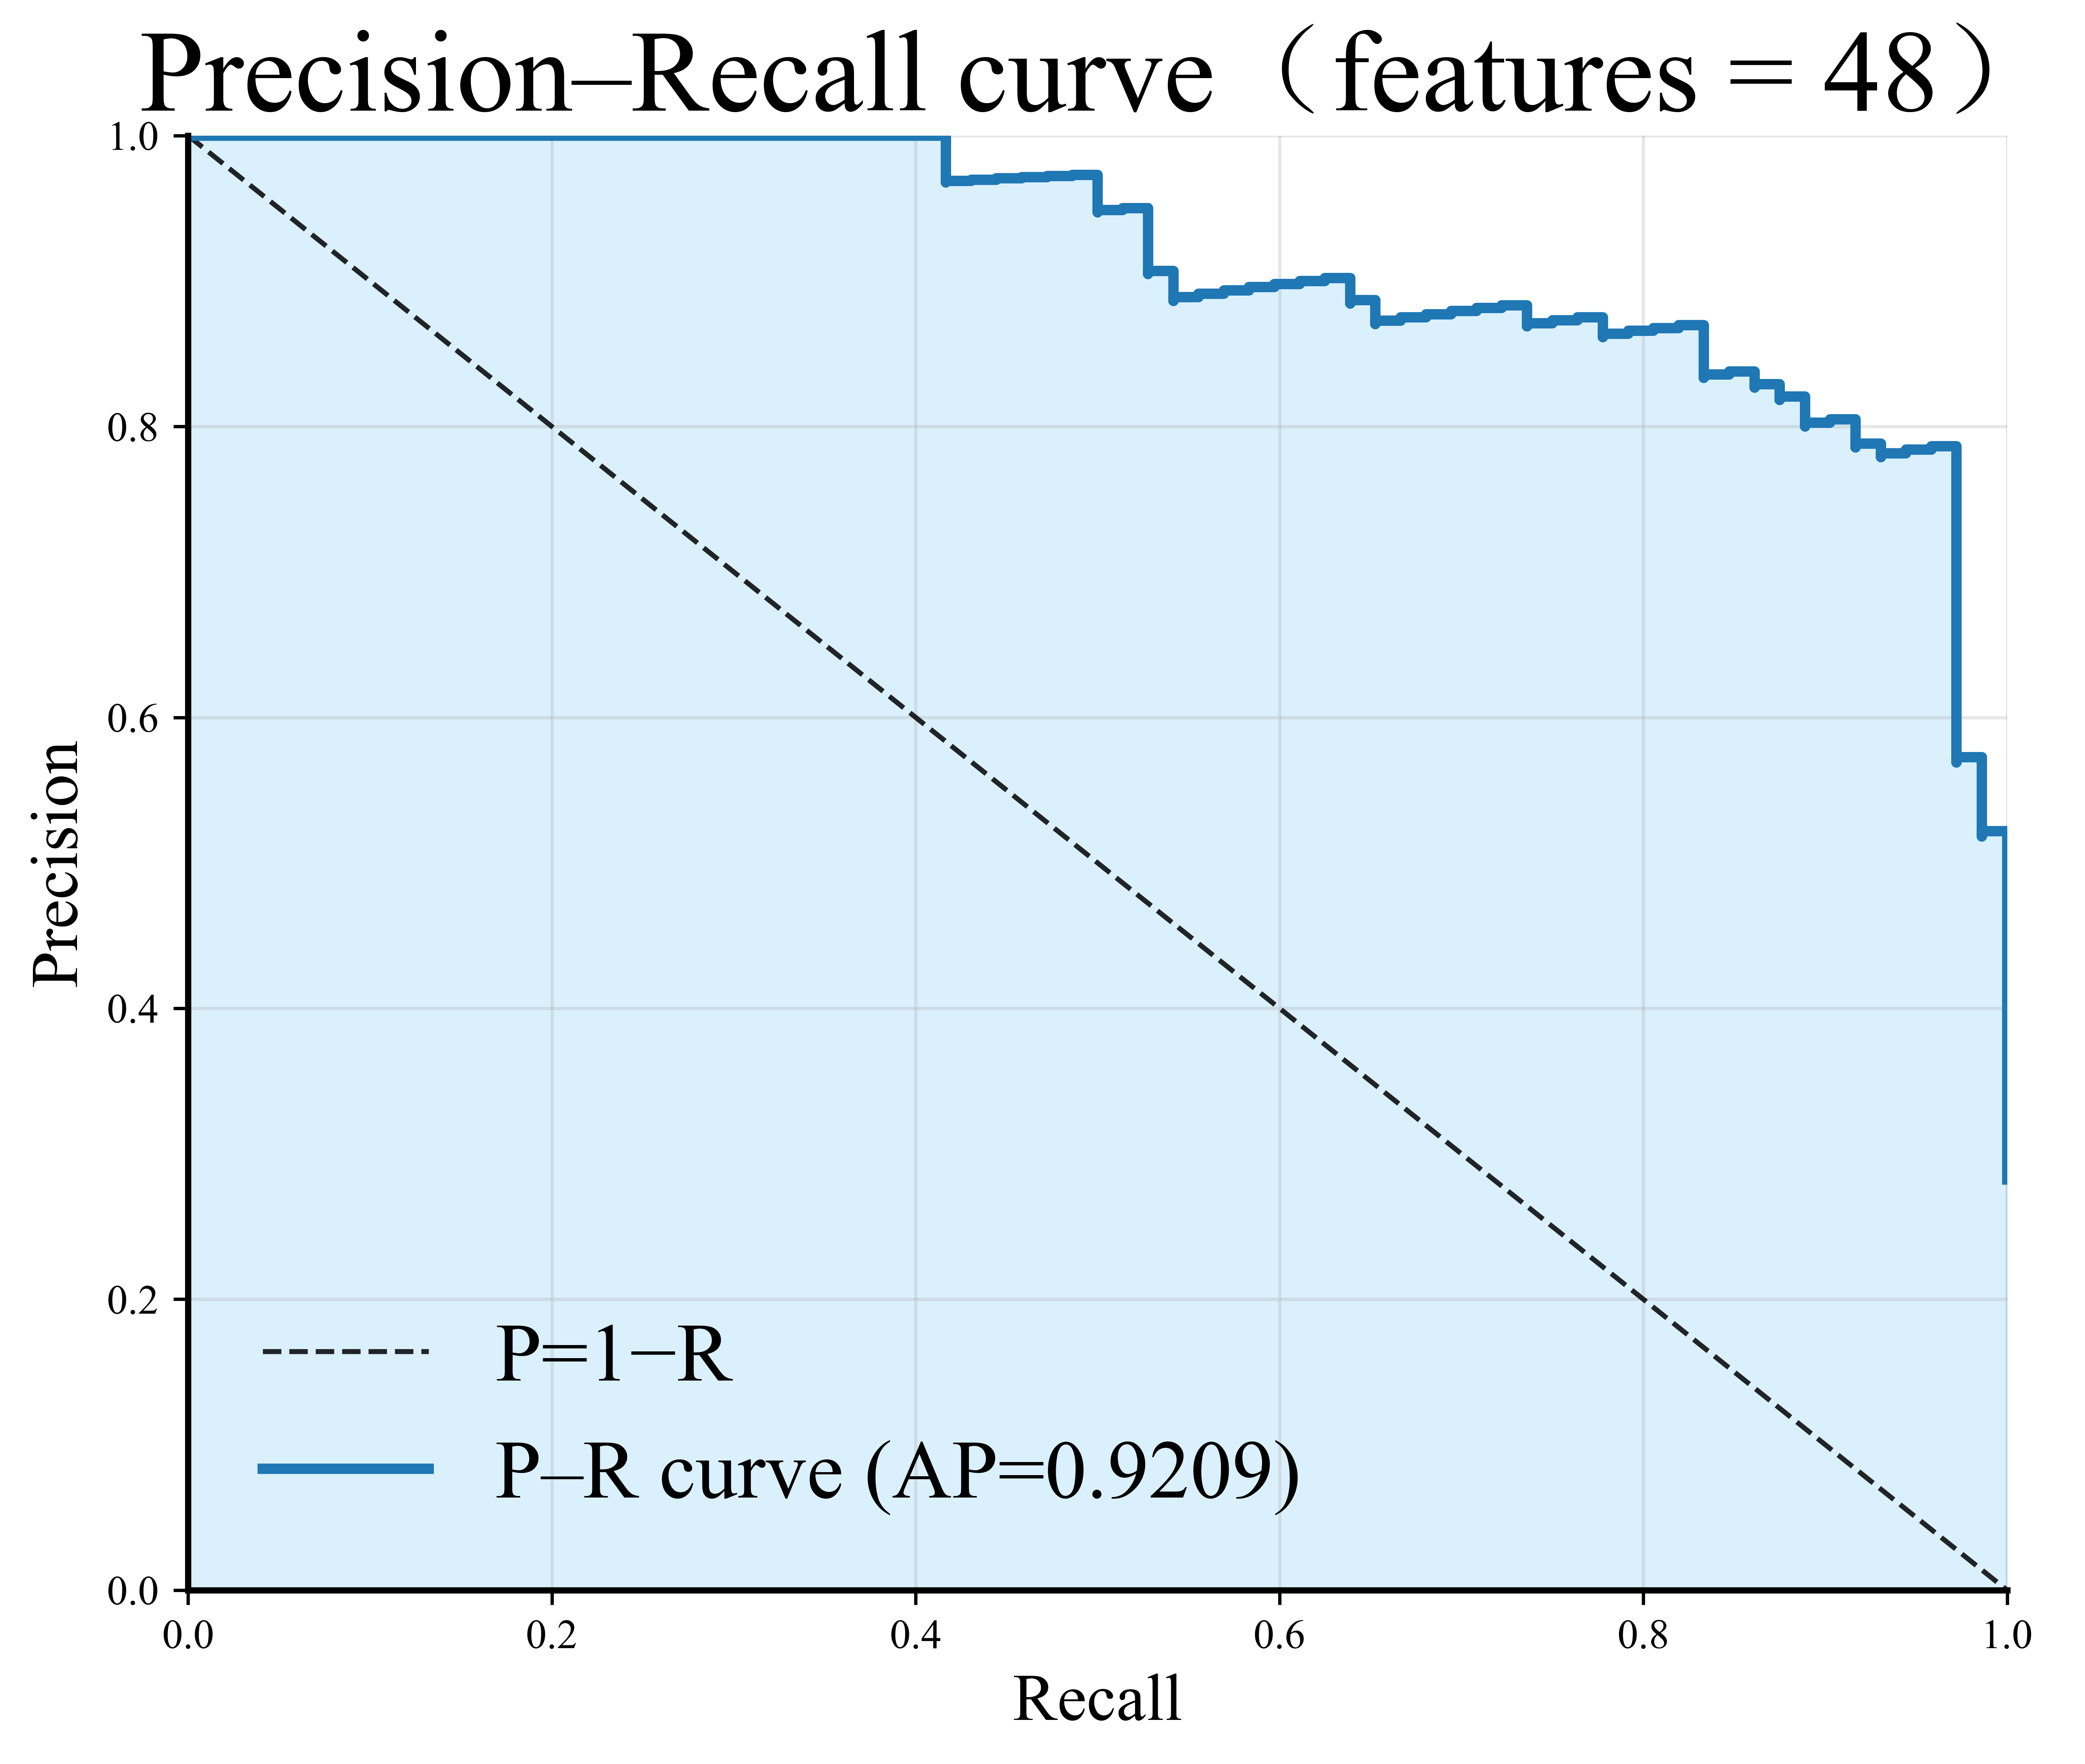 |
| --- | --- | --- |
| 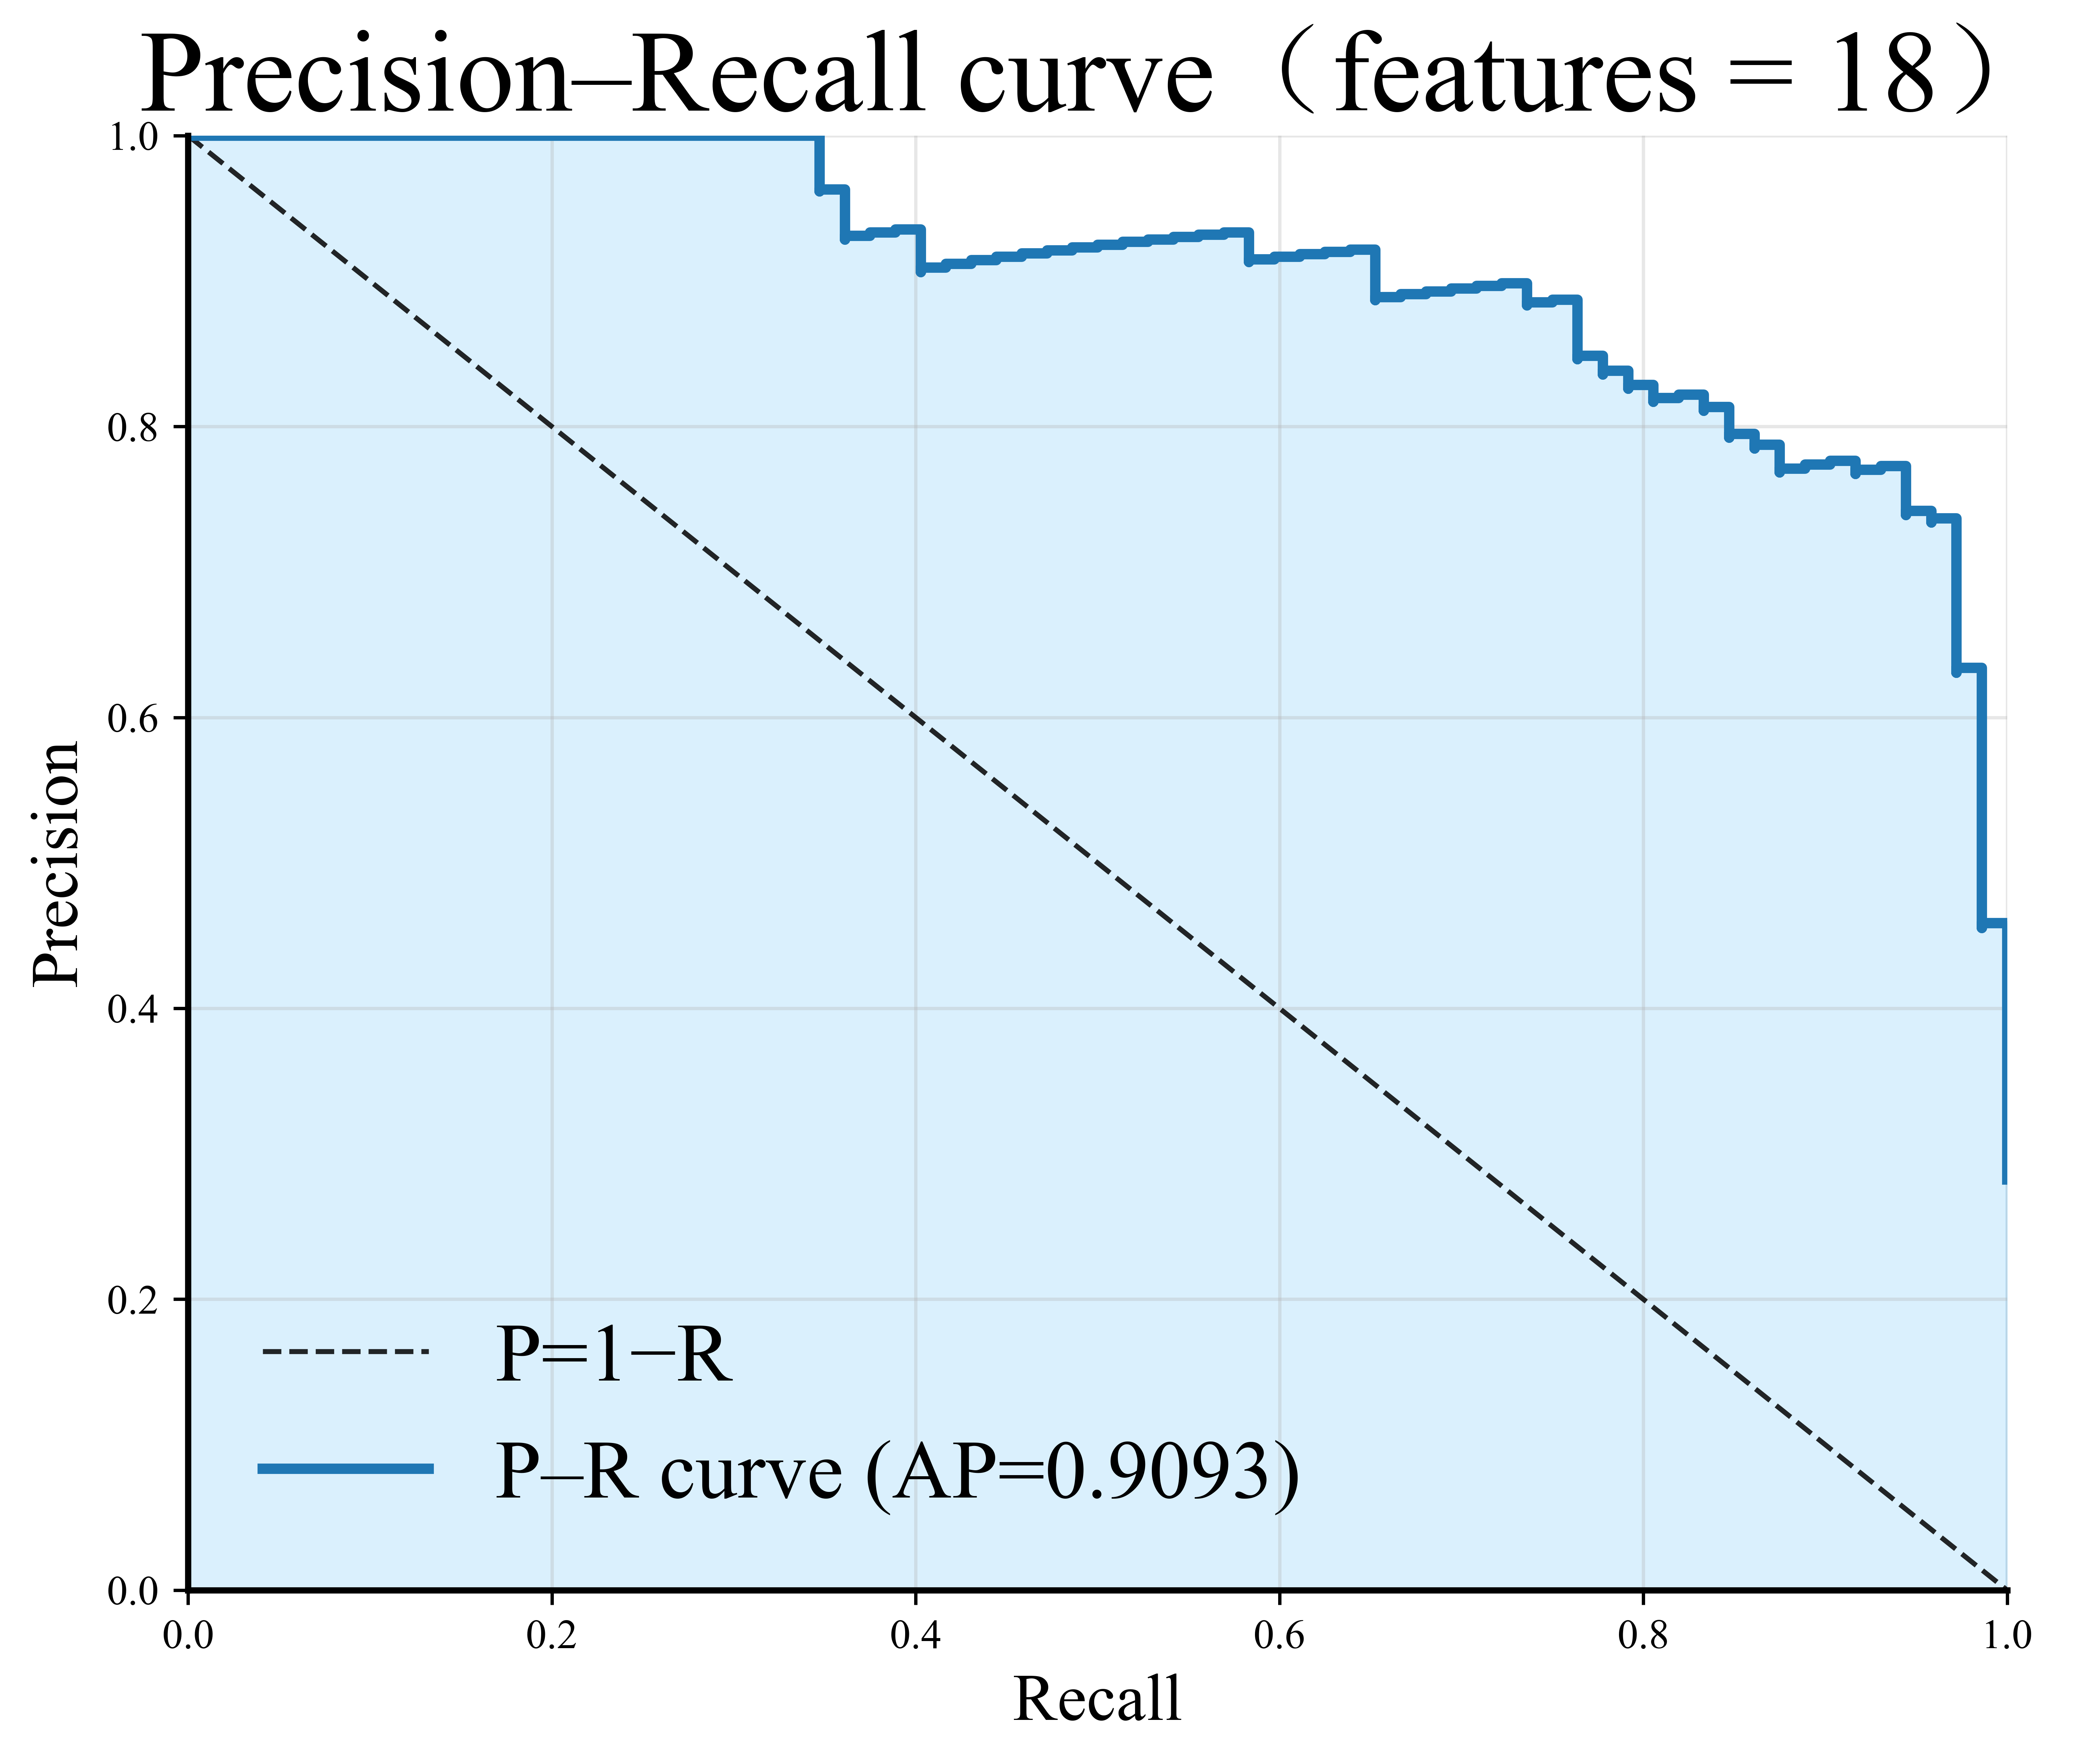 | 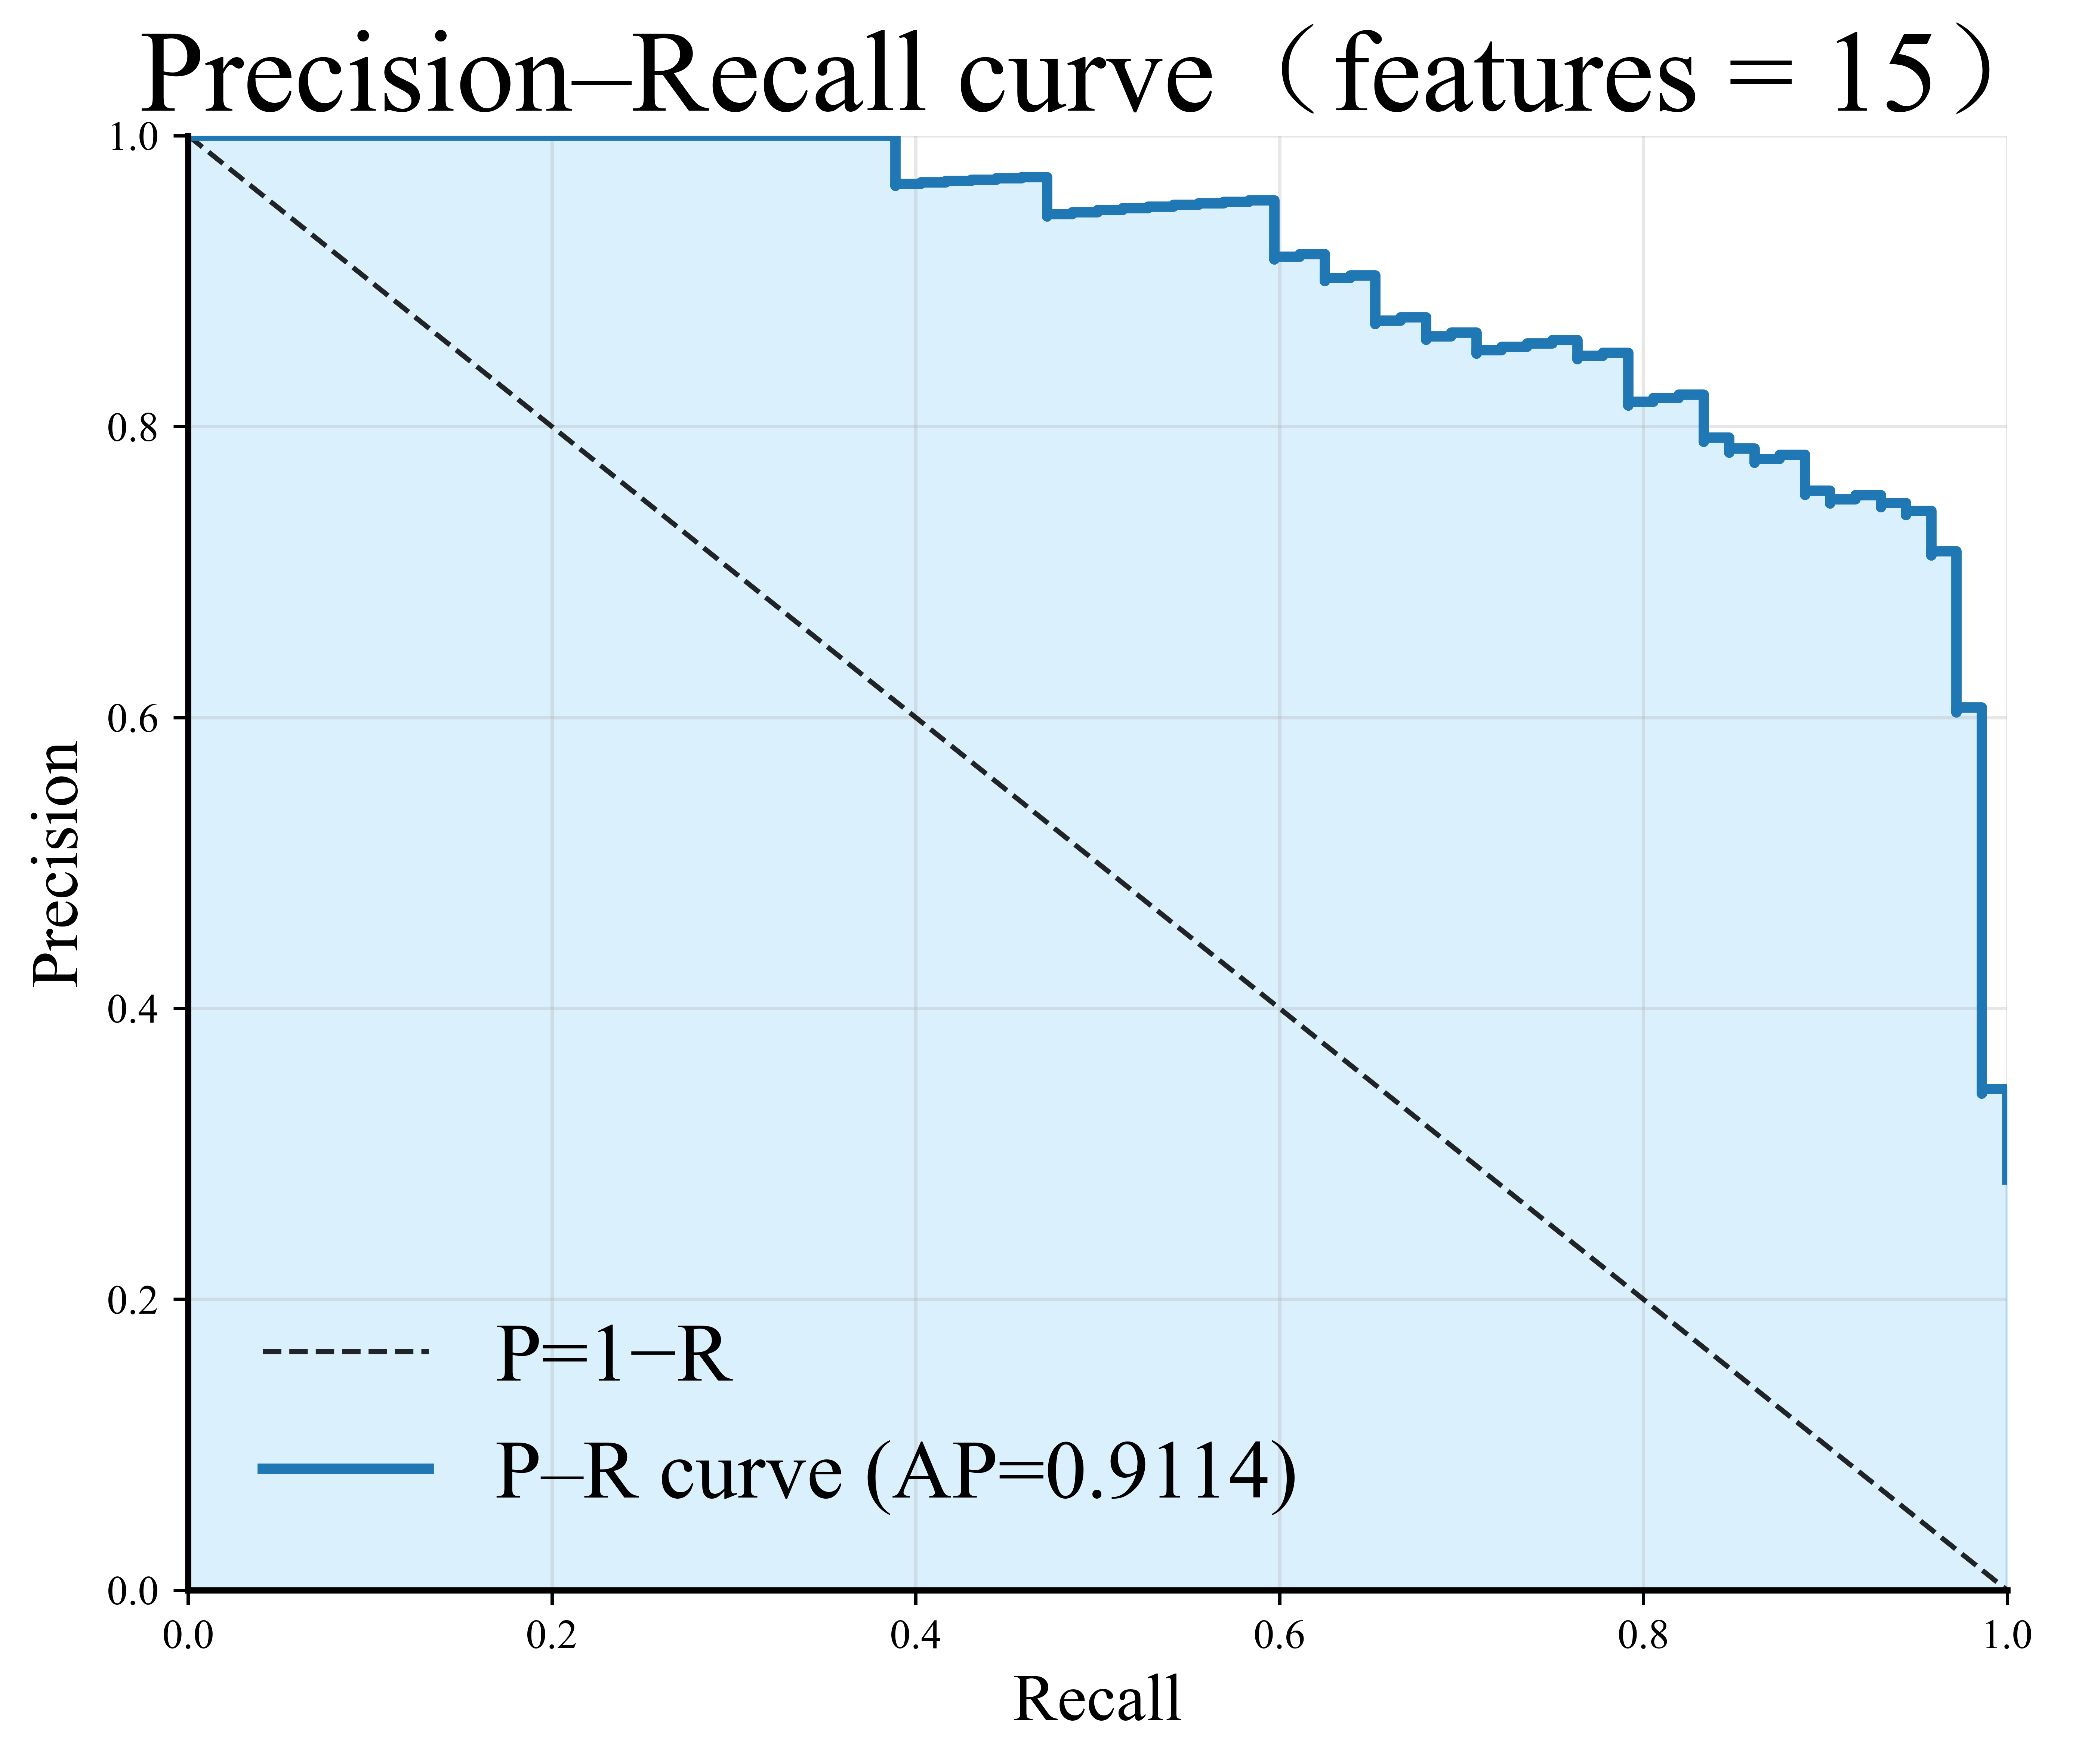 | 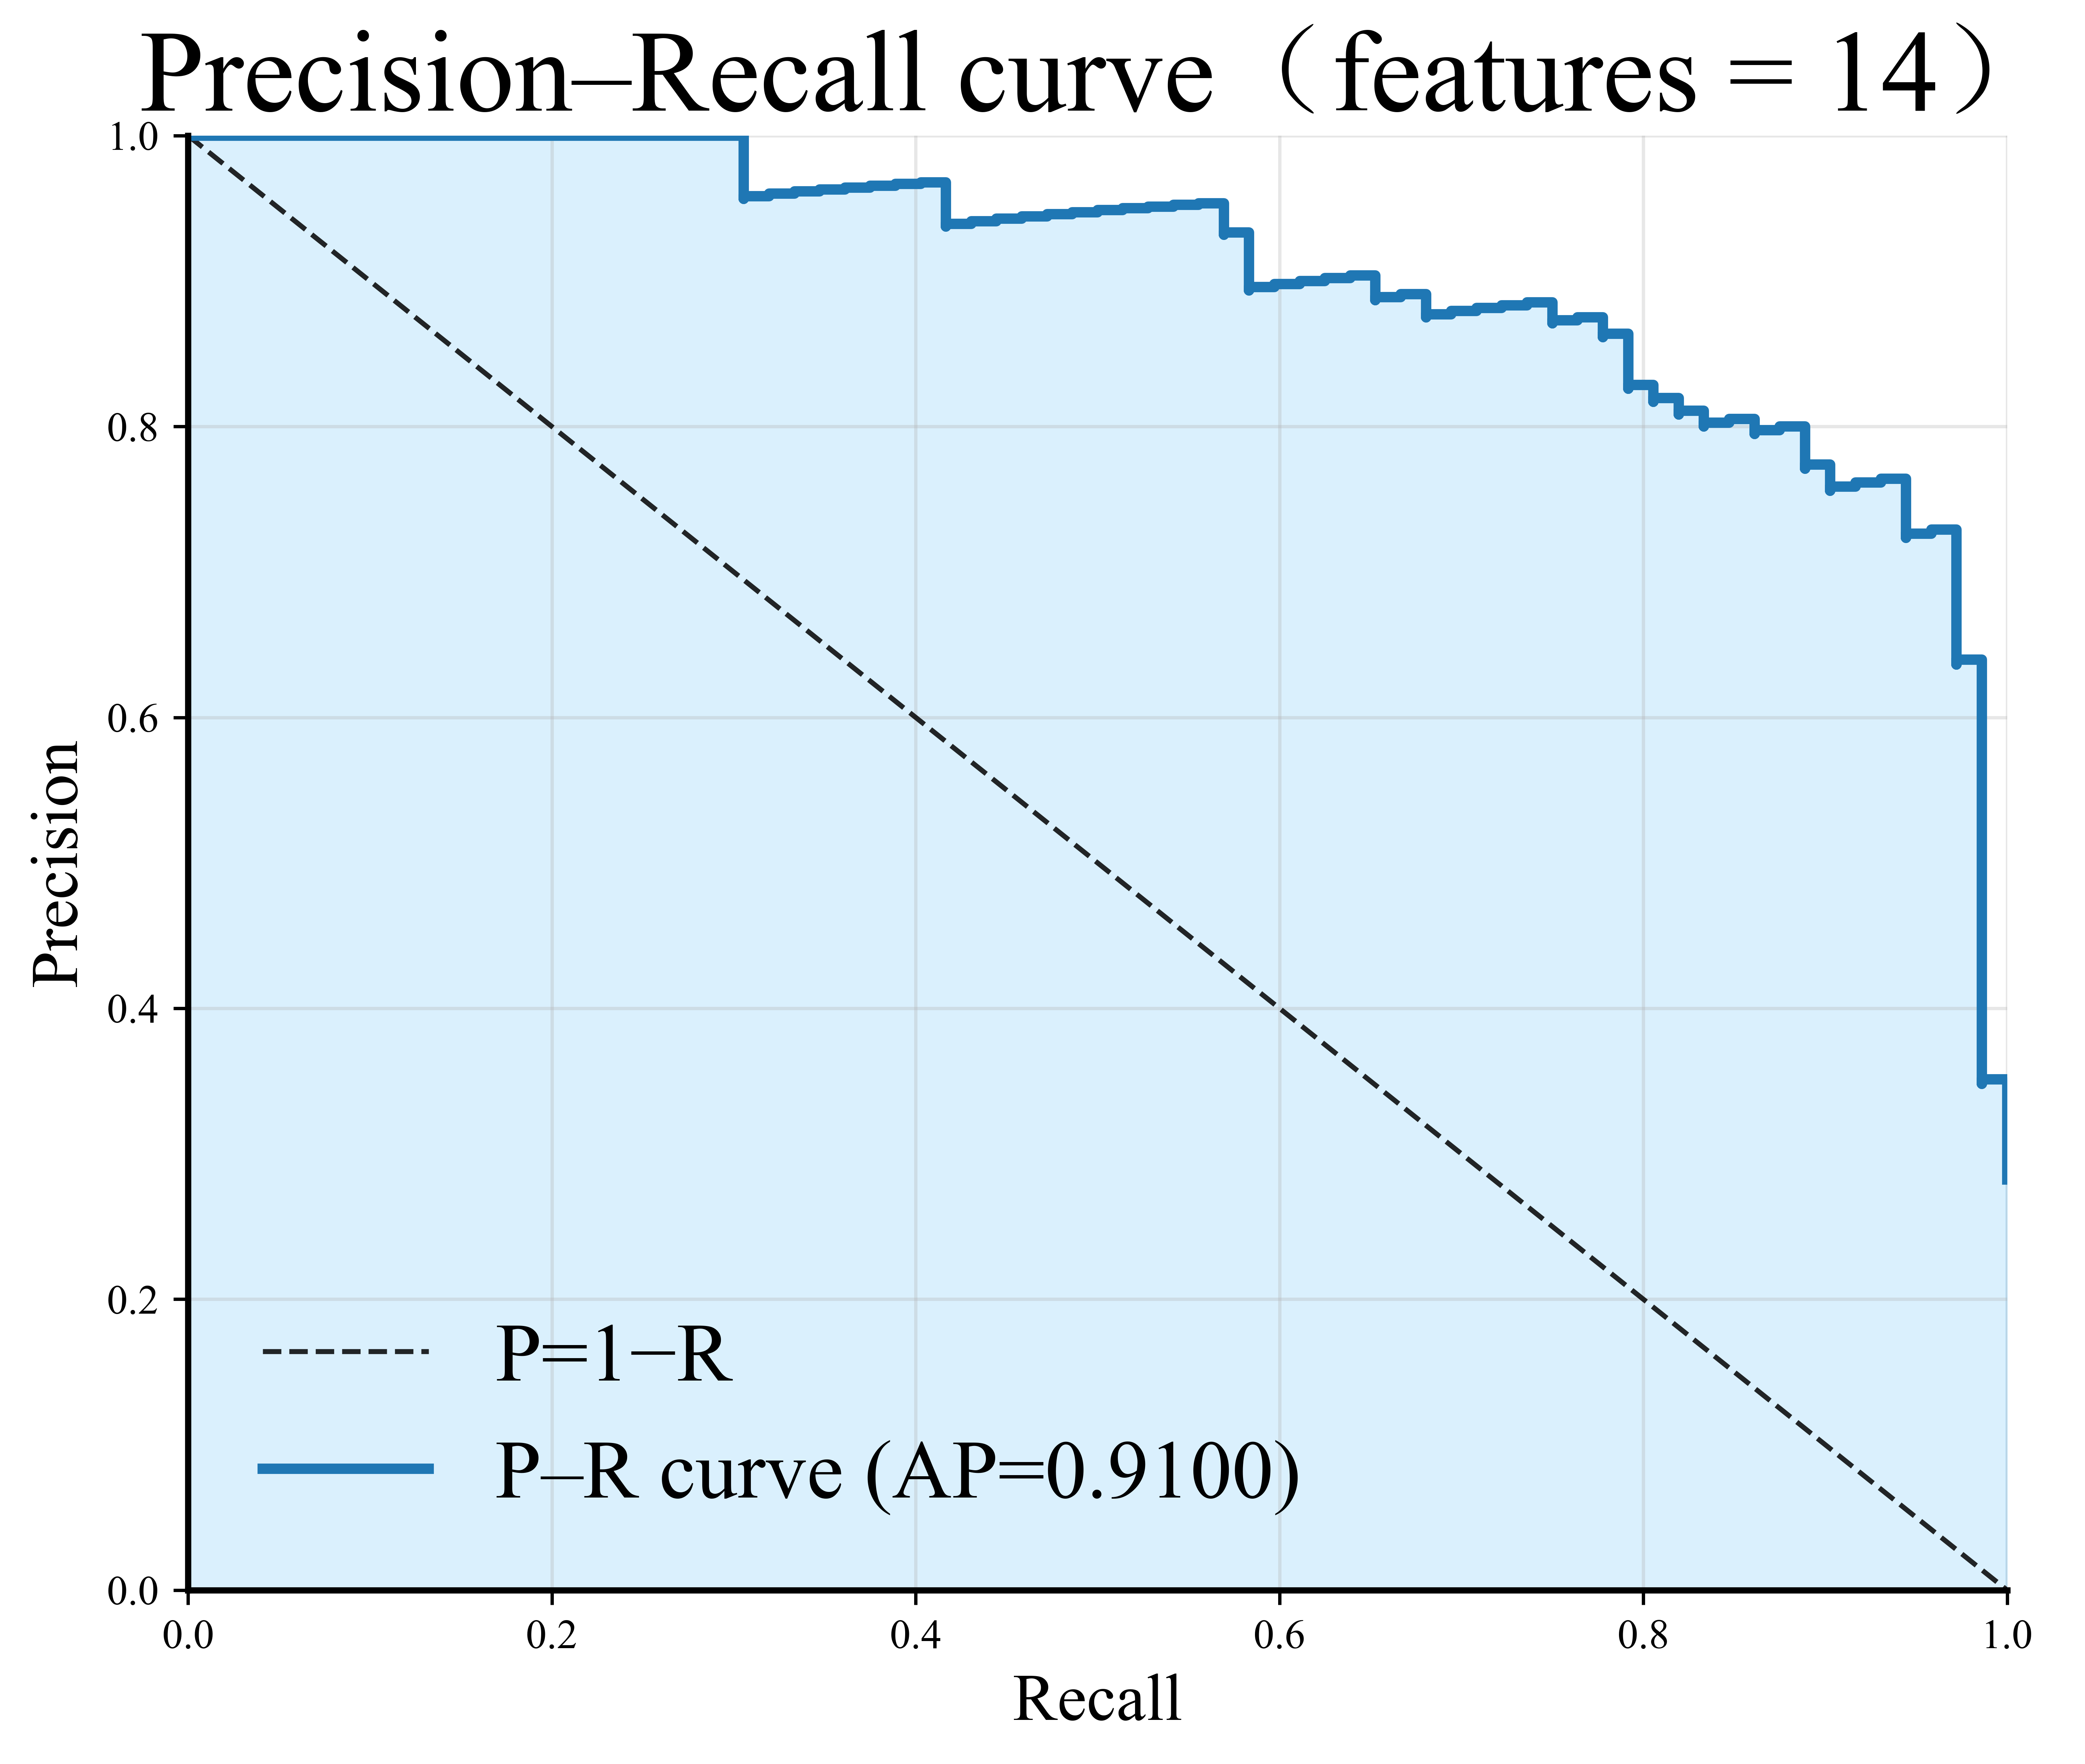 |
| 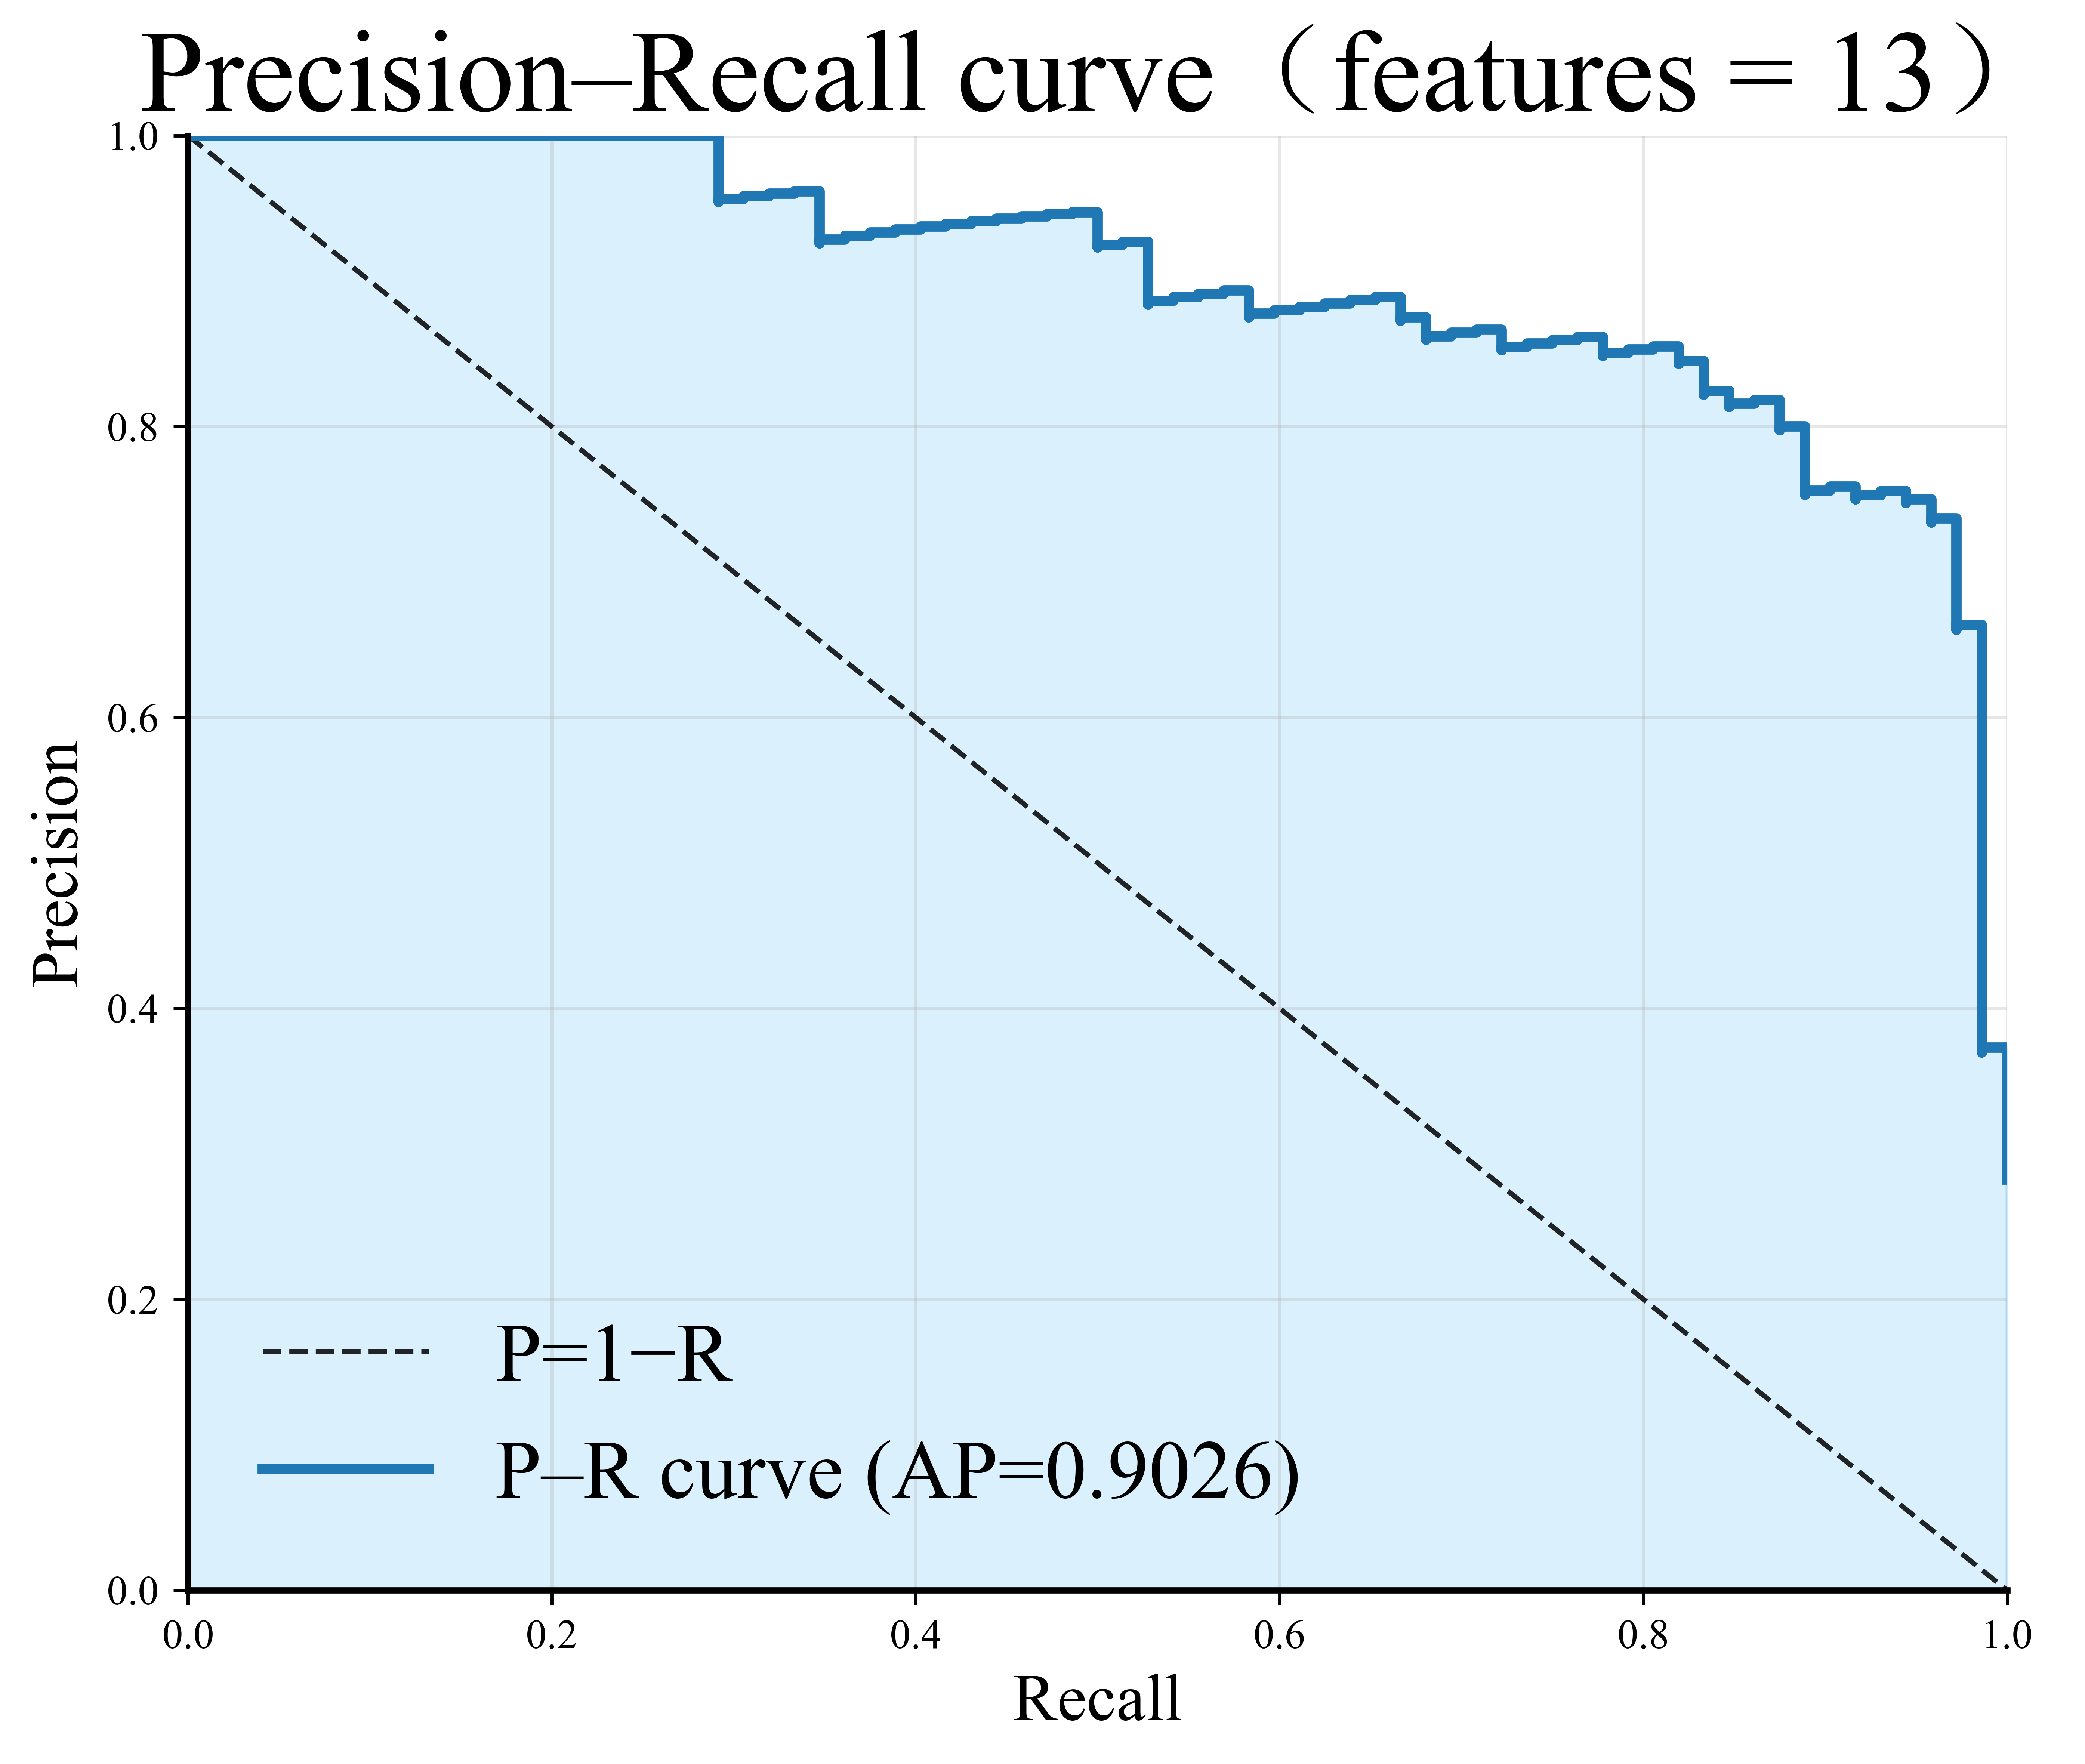 | 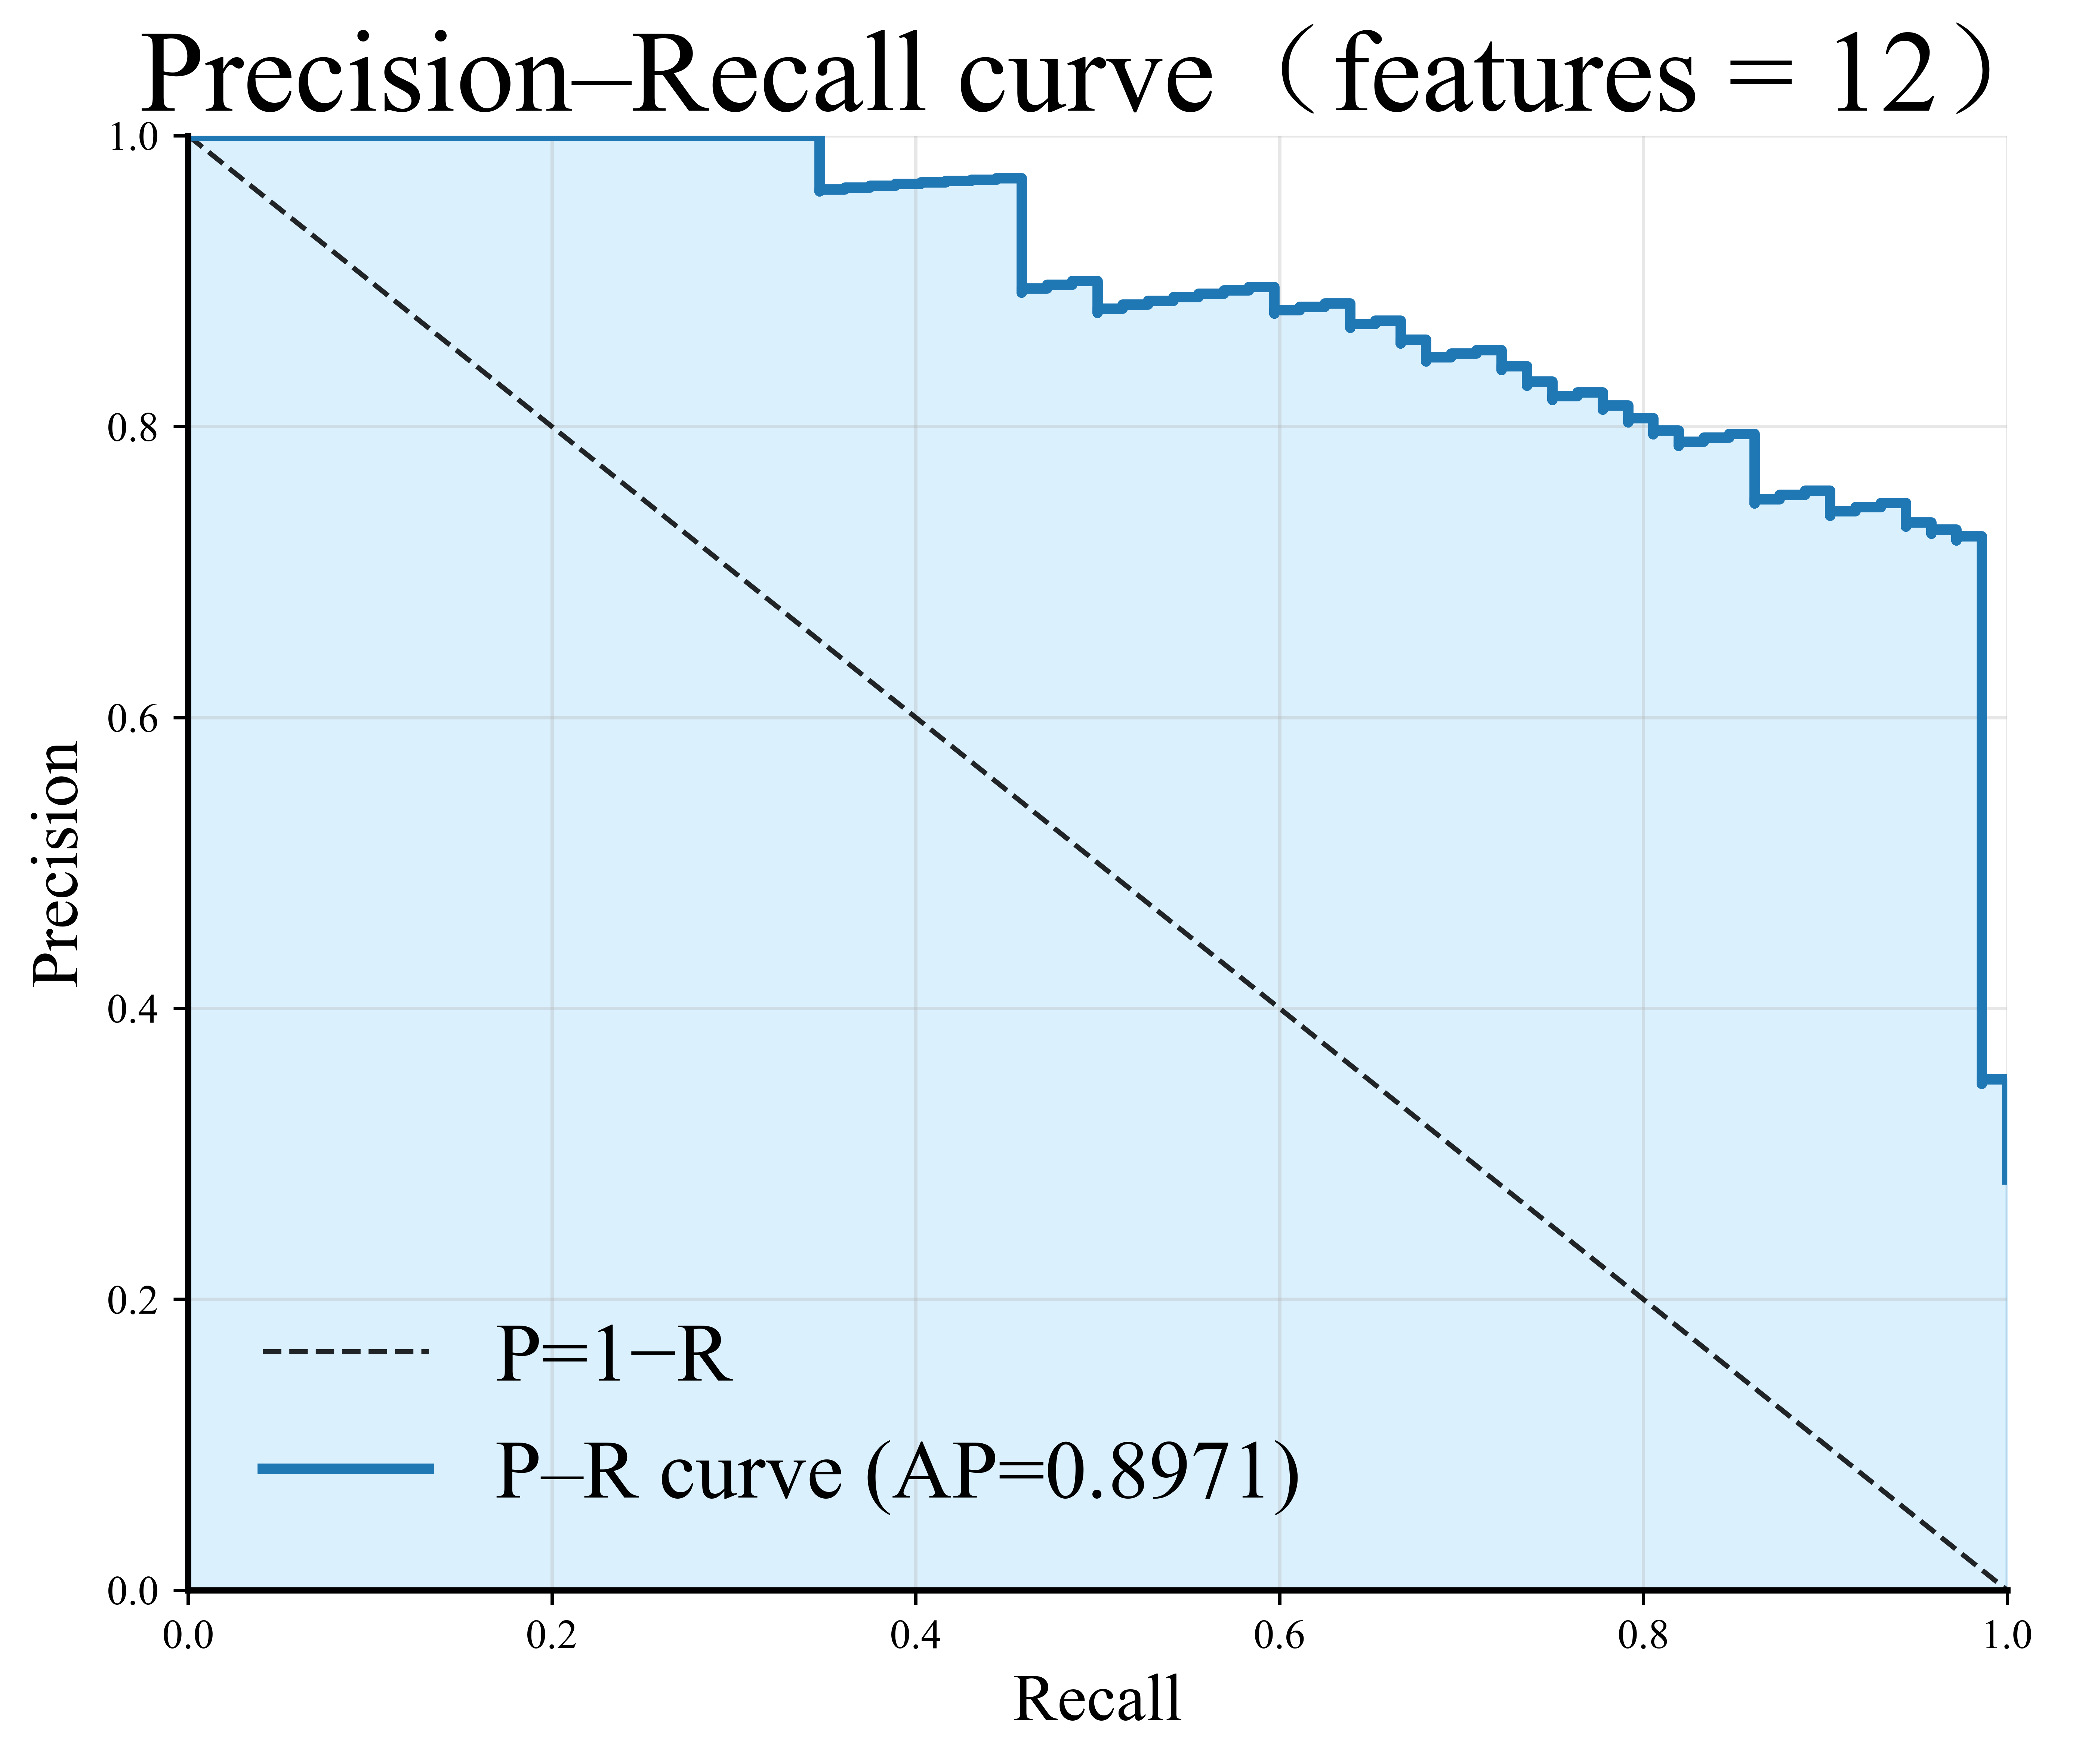 | 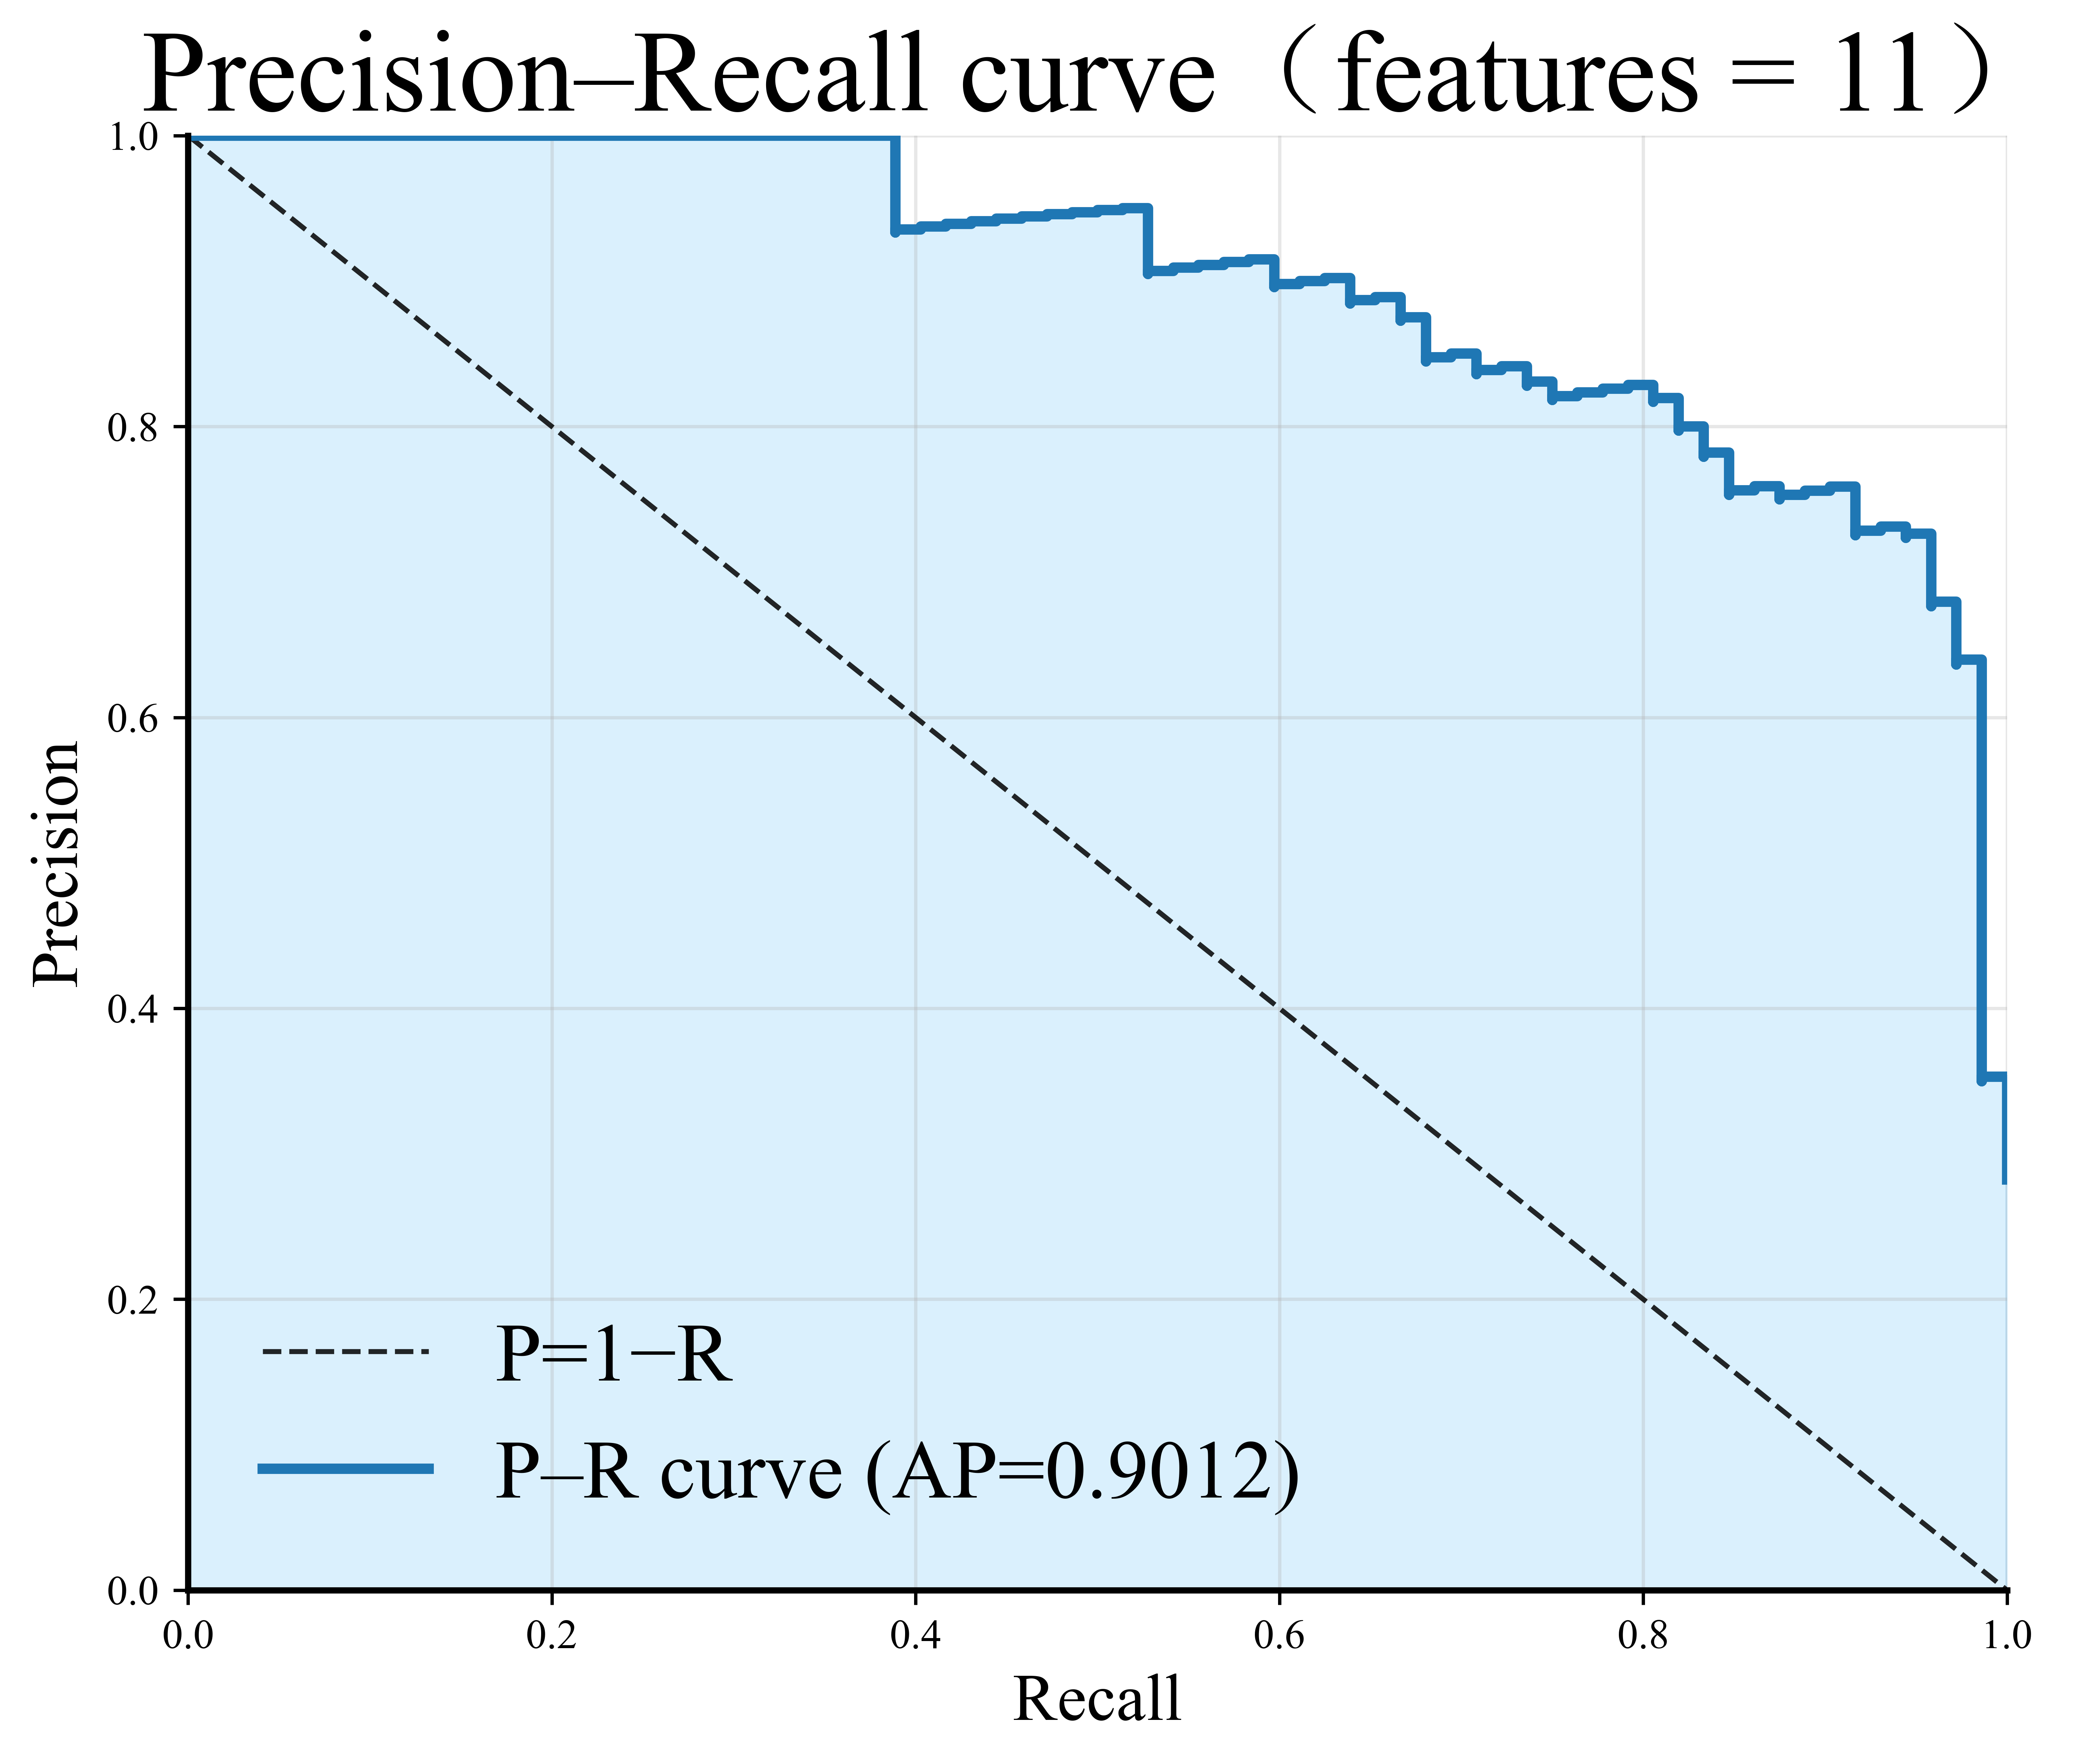 |
| 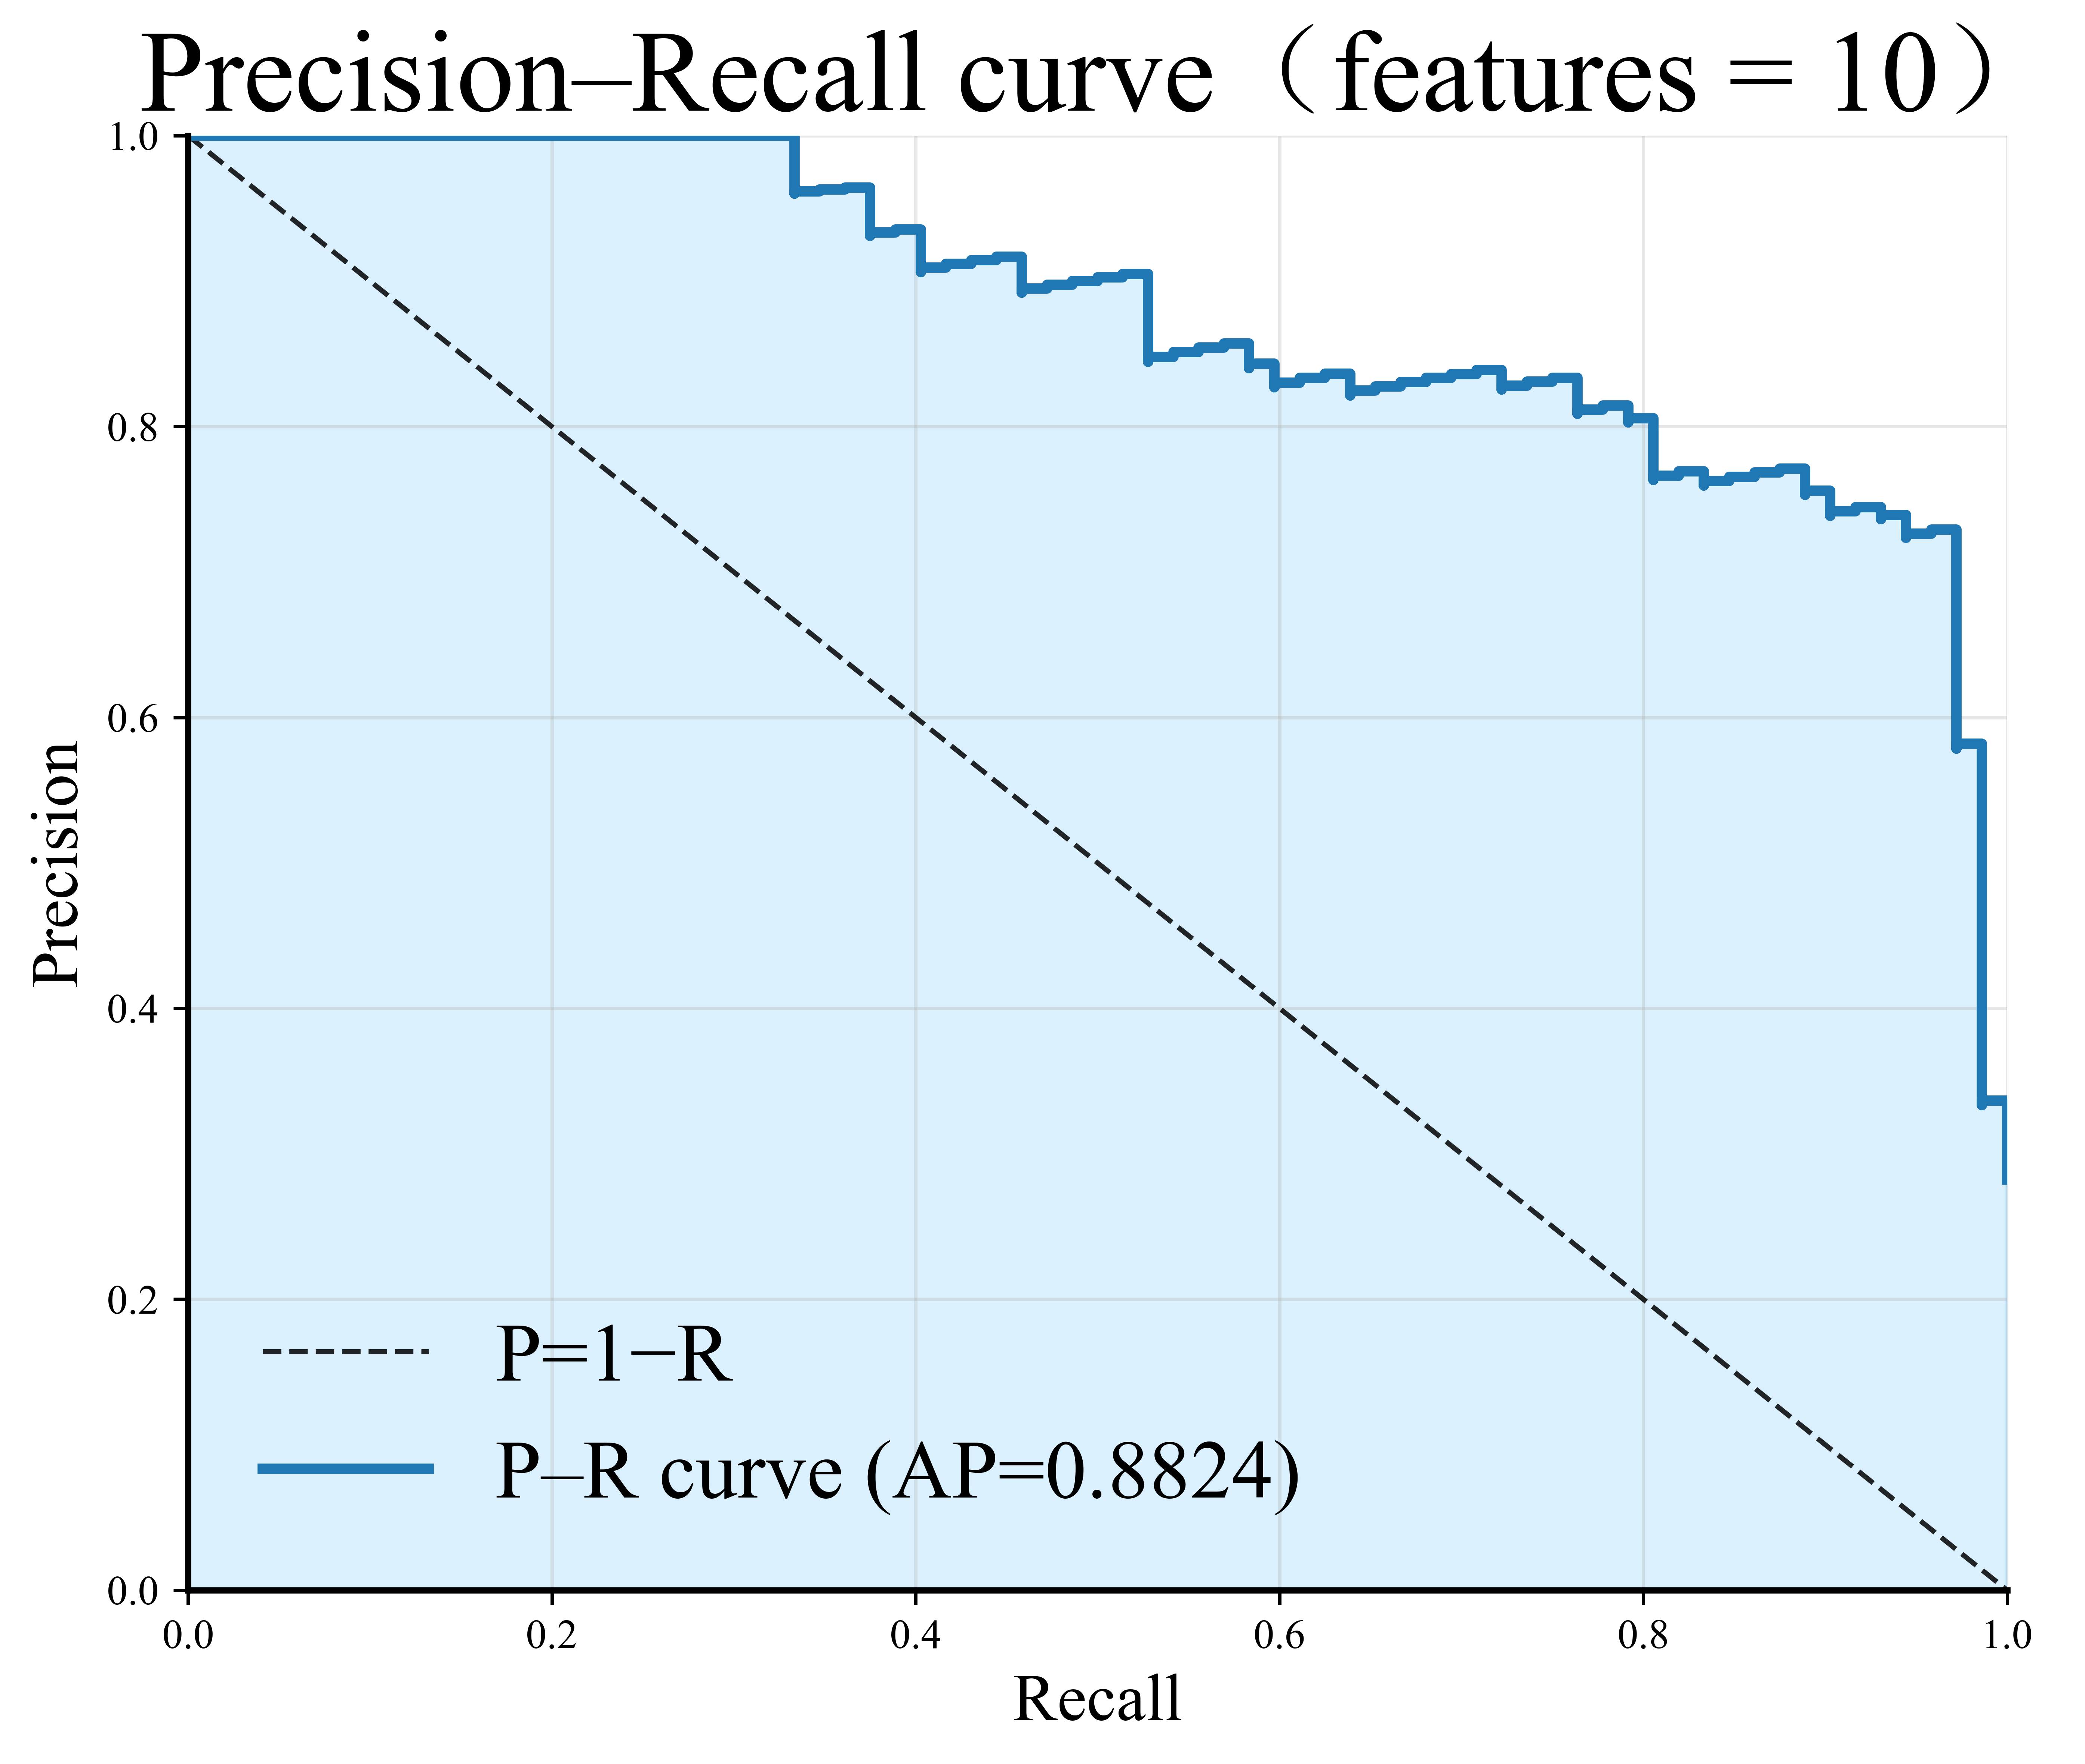 | 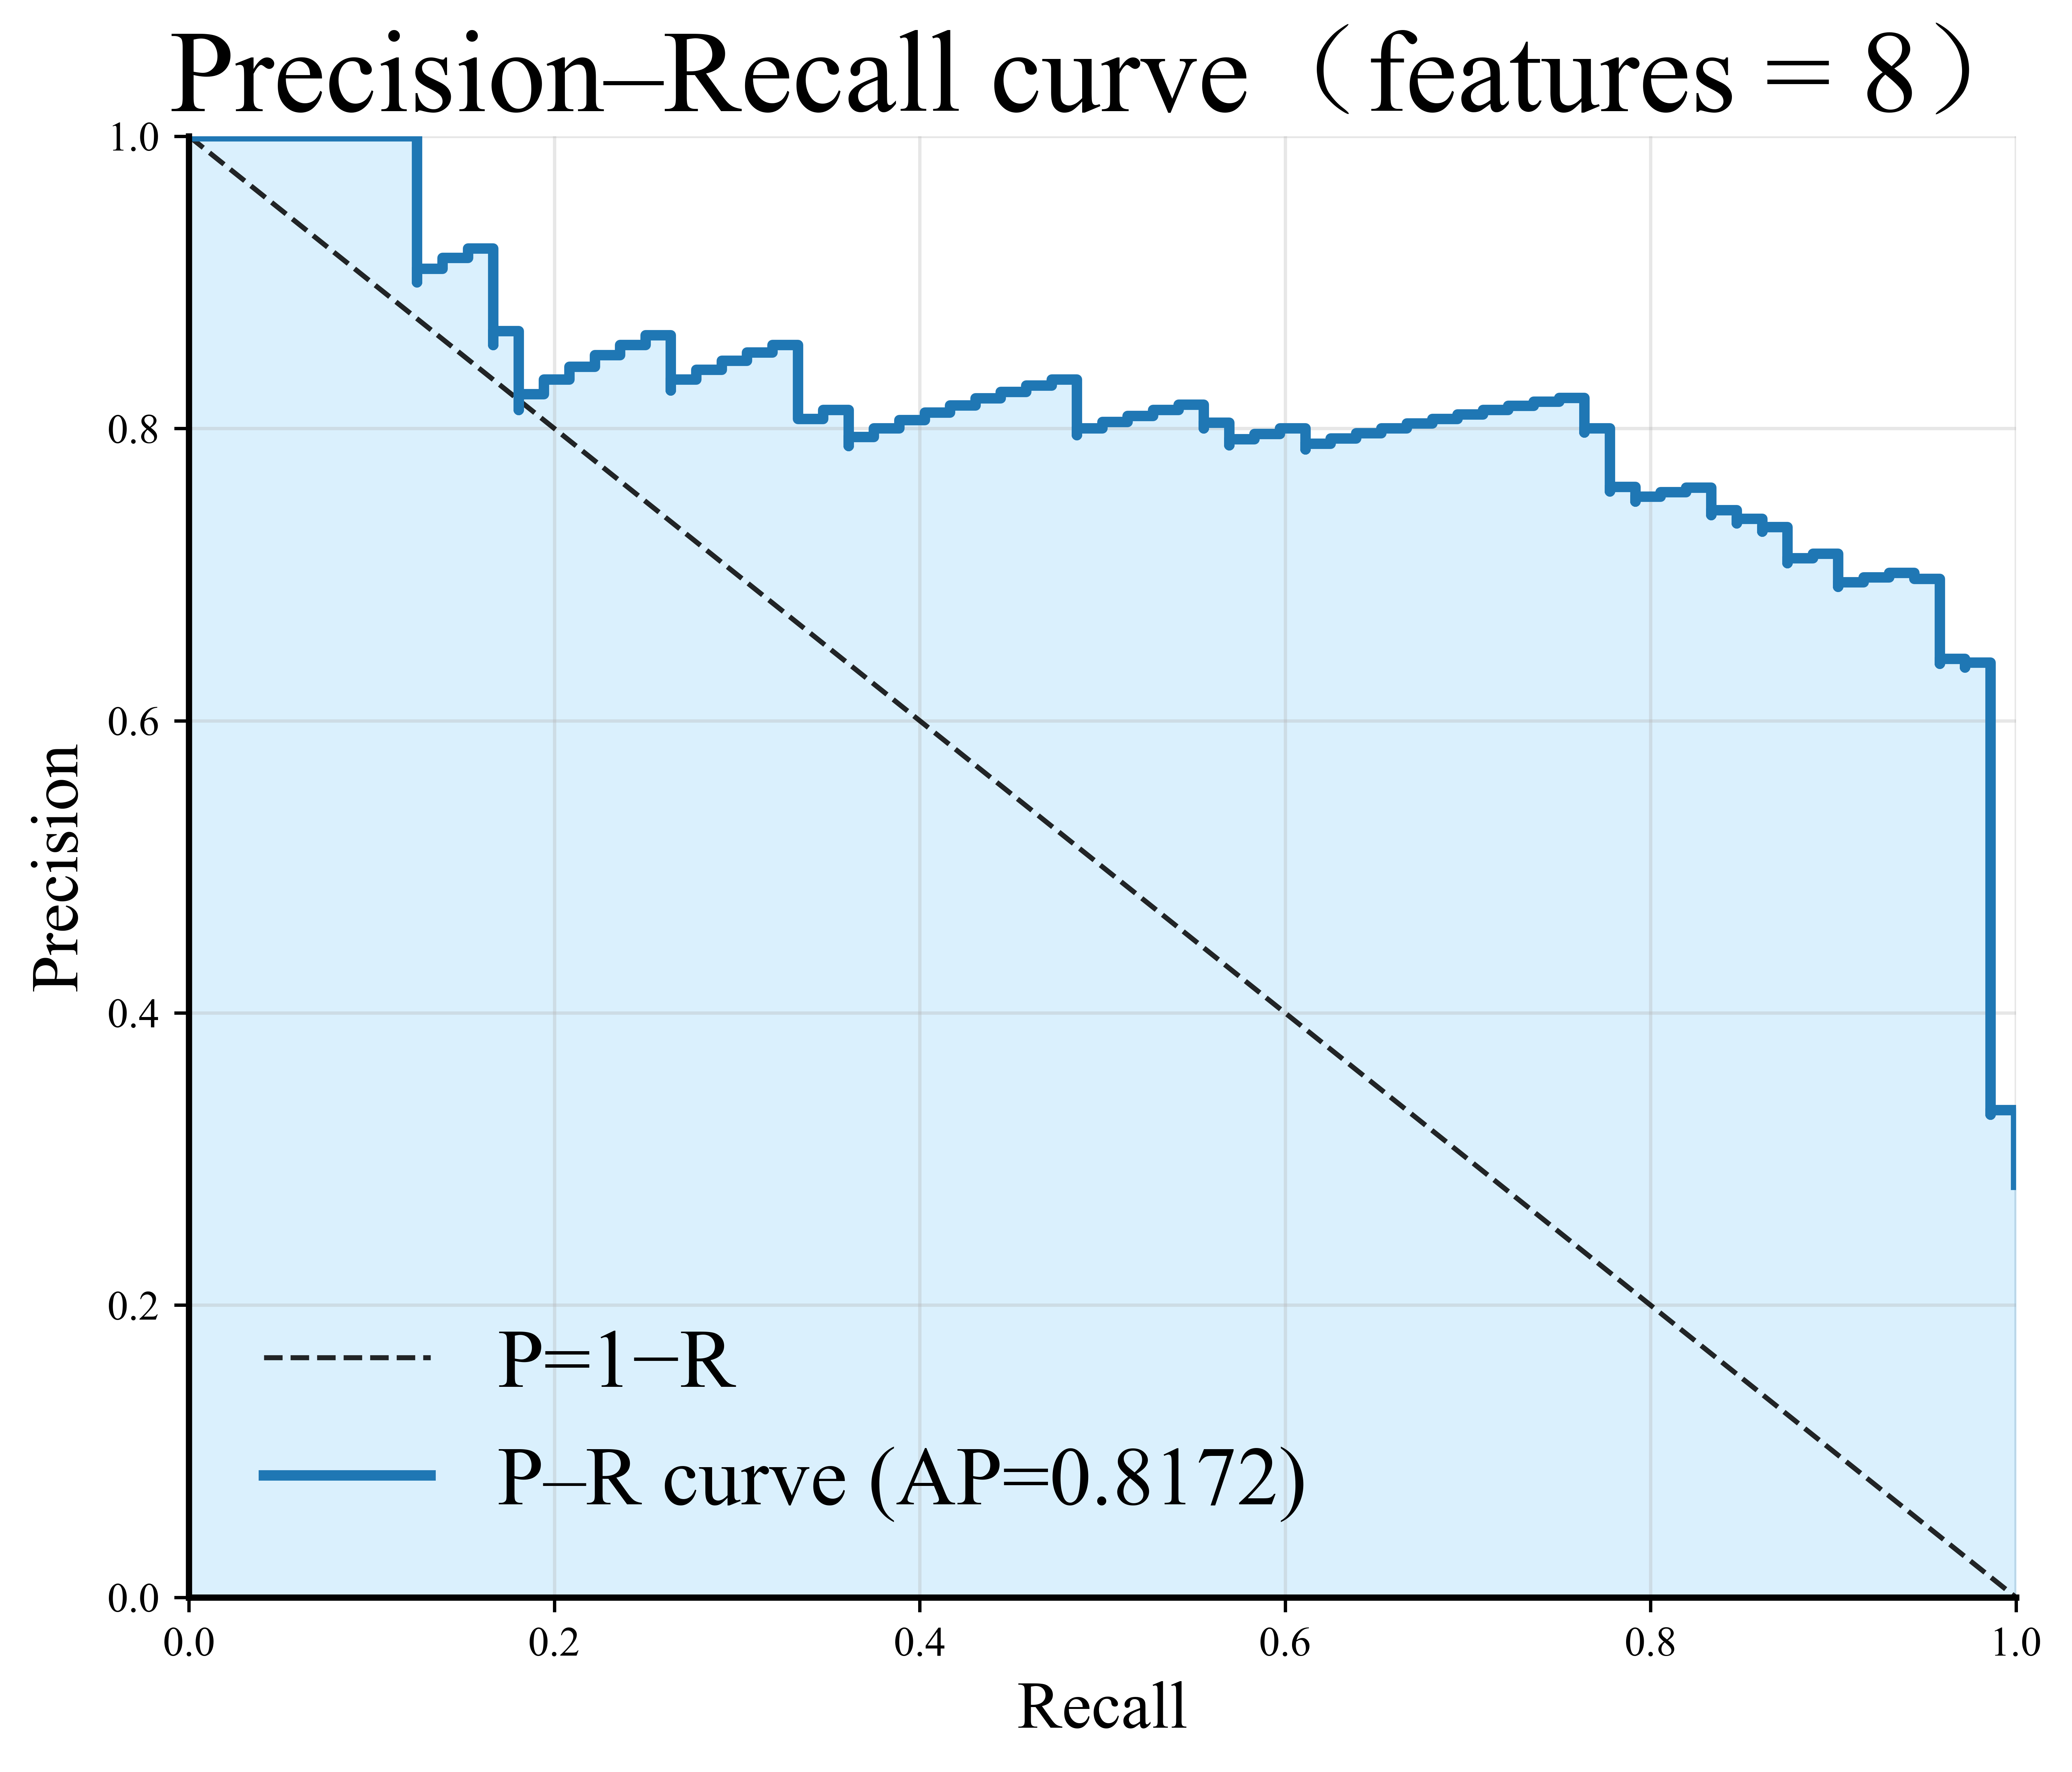 | 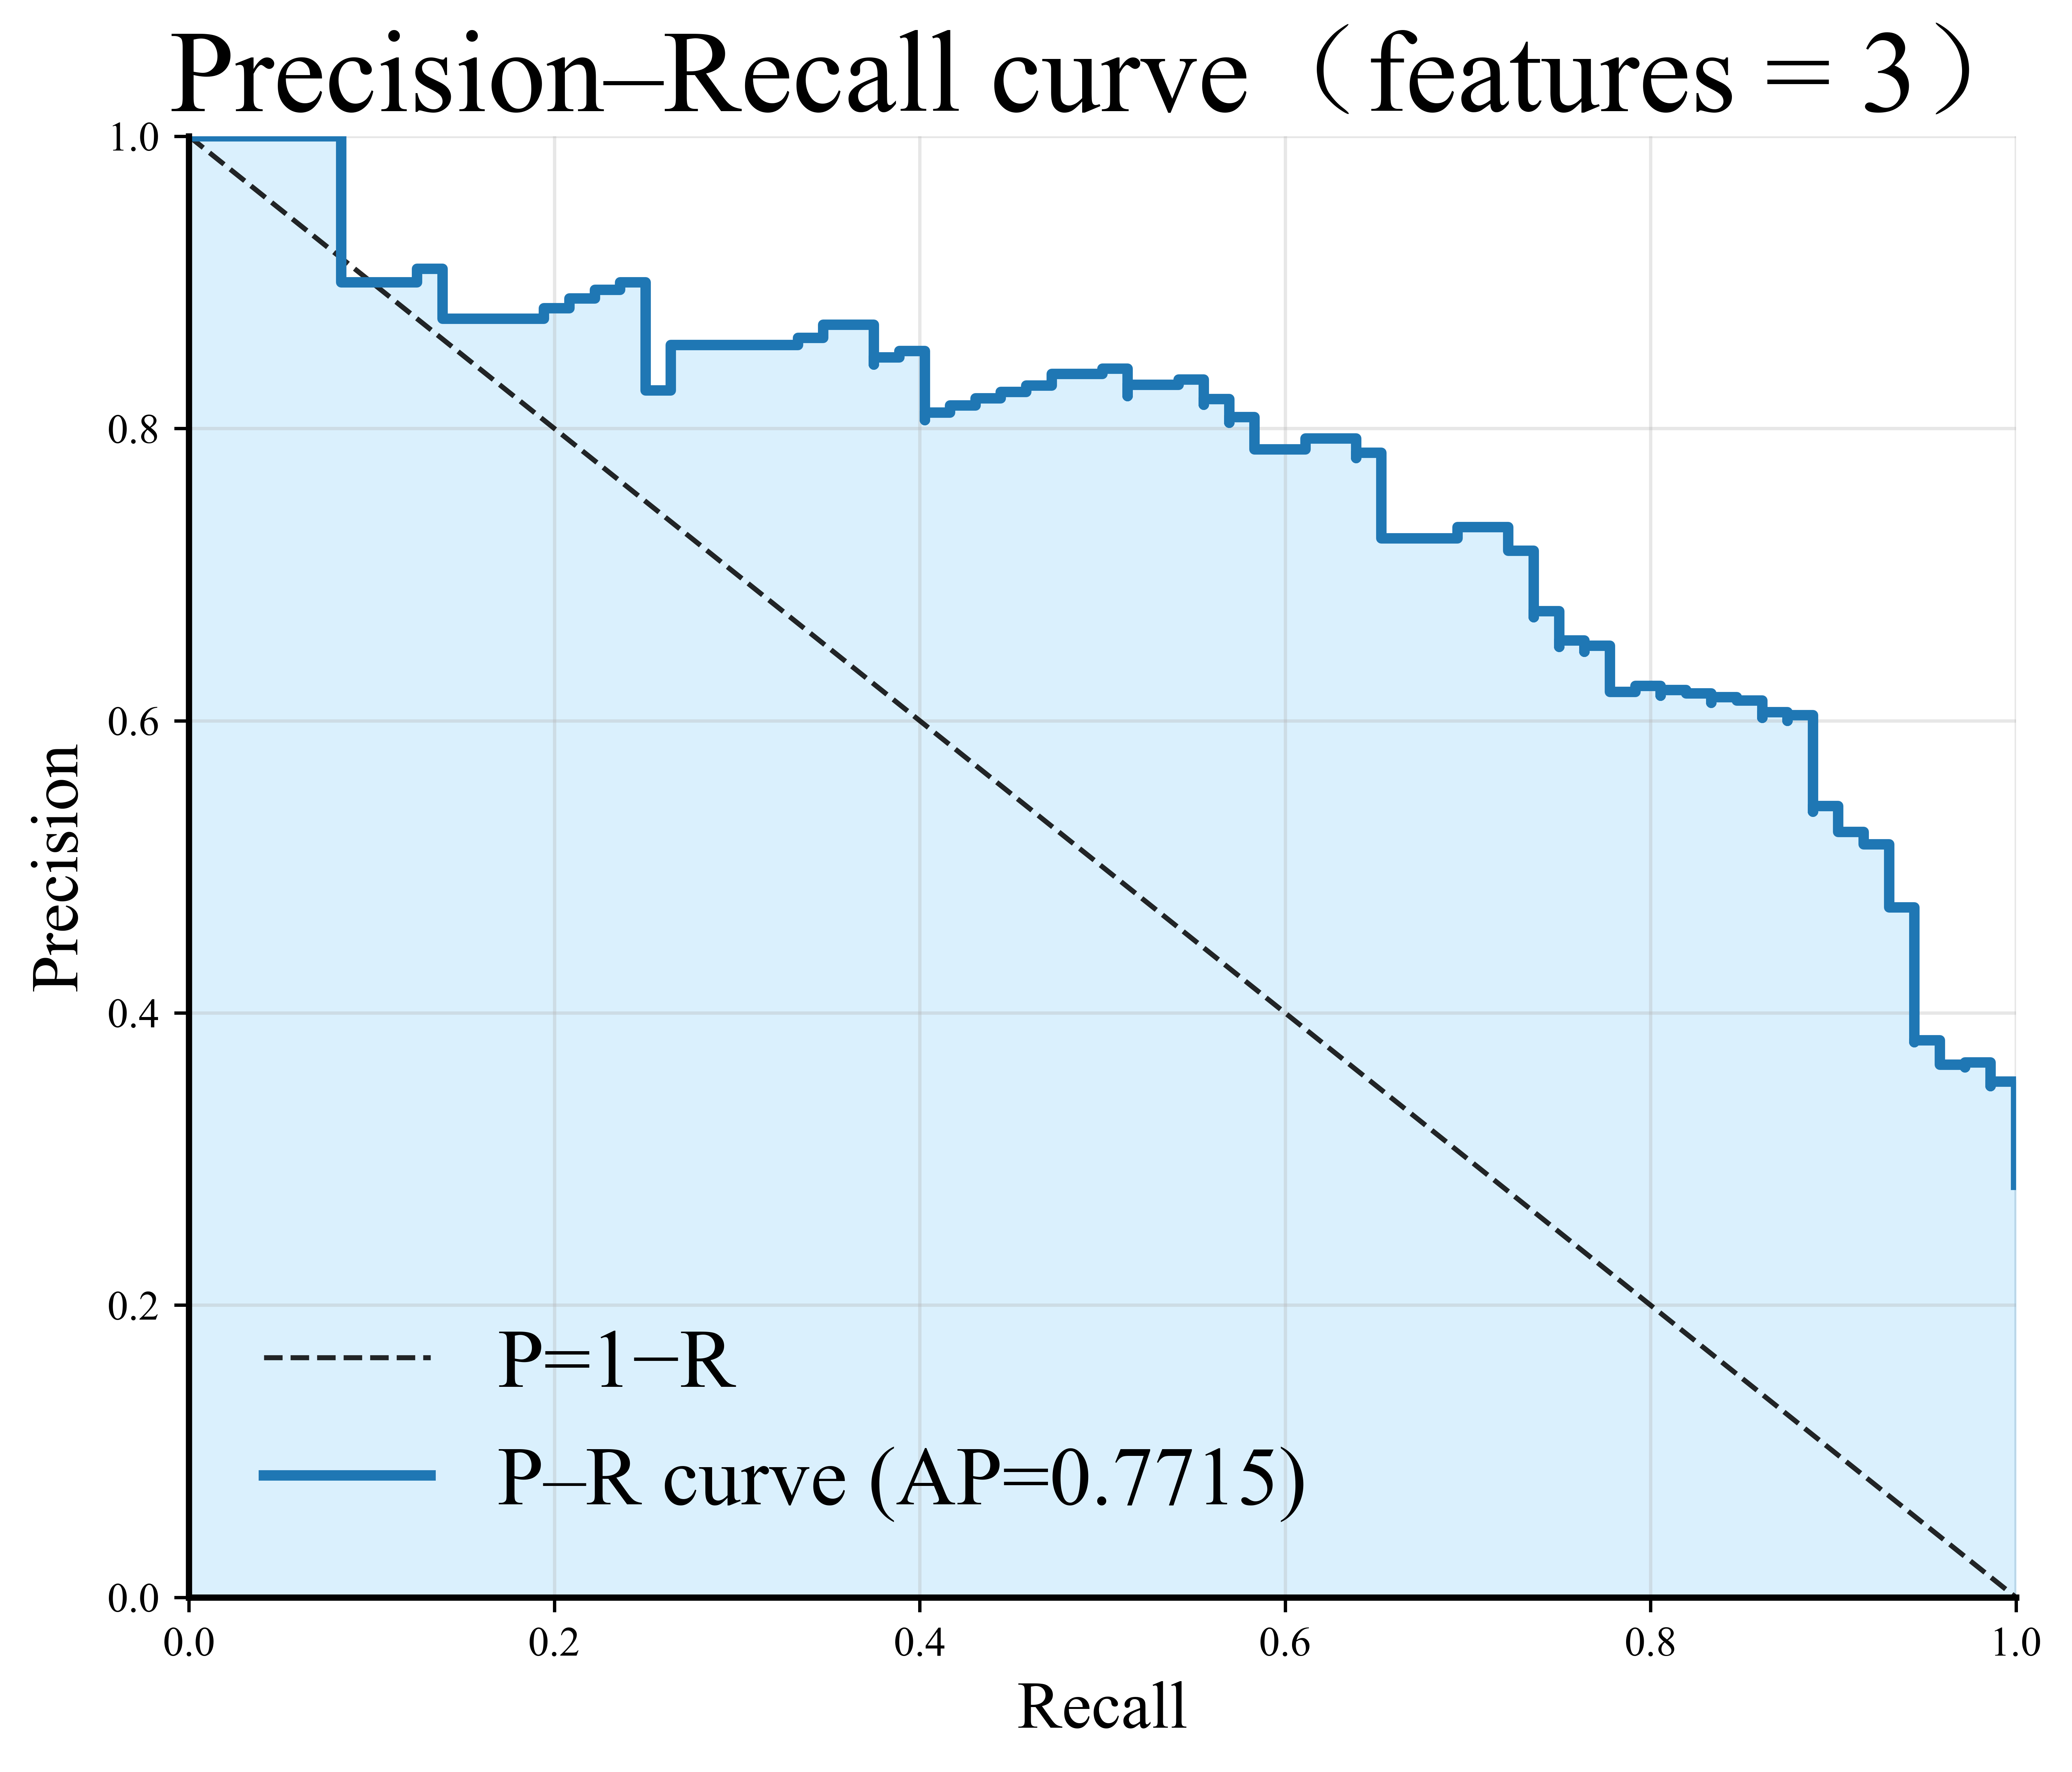 |

**Supplementary Figure S2** P-R curves of LightGBM model with different features.

|  |
| --- |

**Supplementary Figure S3** Calibration curve for the 13-feature LightGBM model.

| 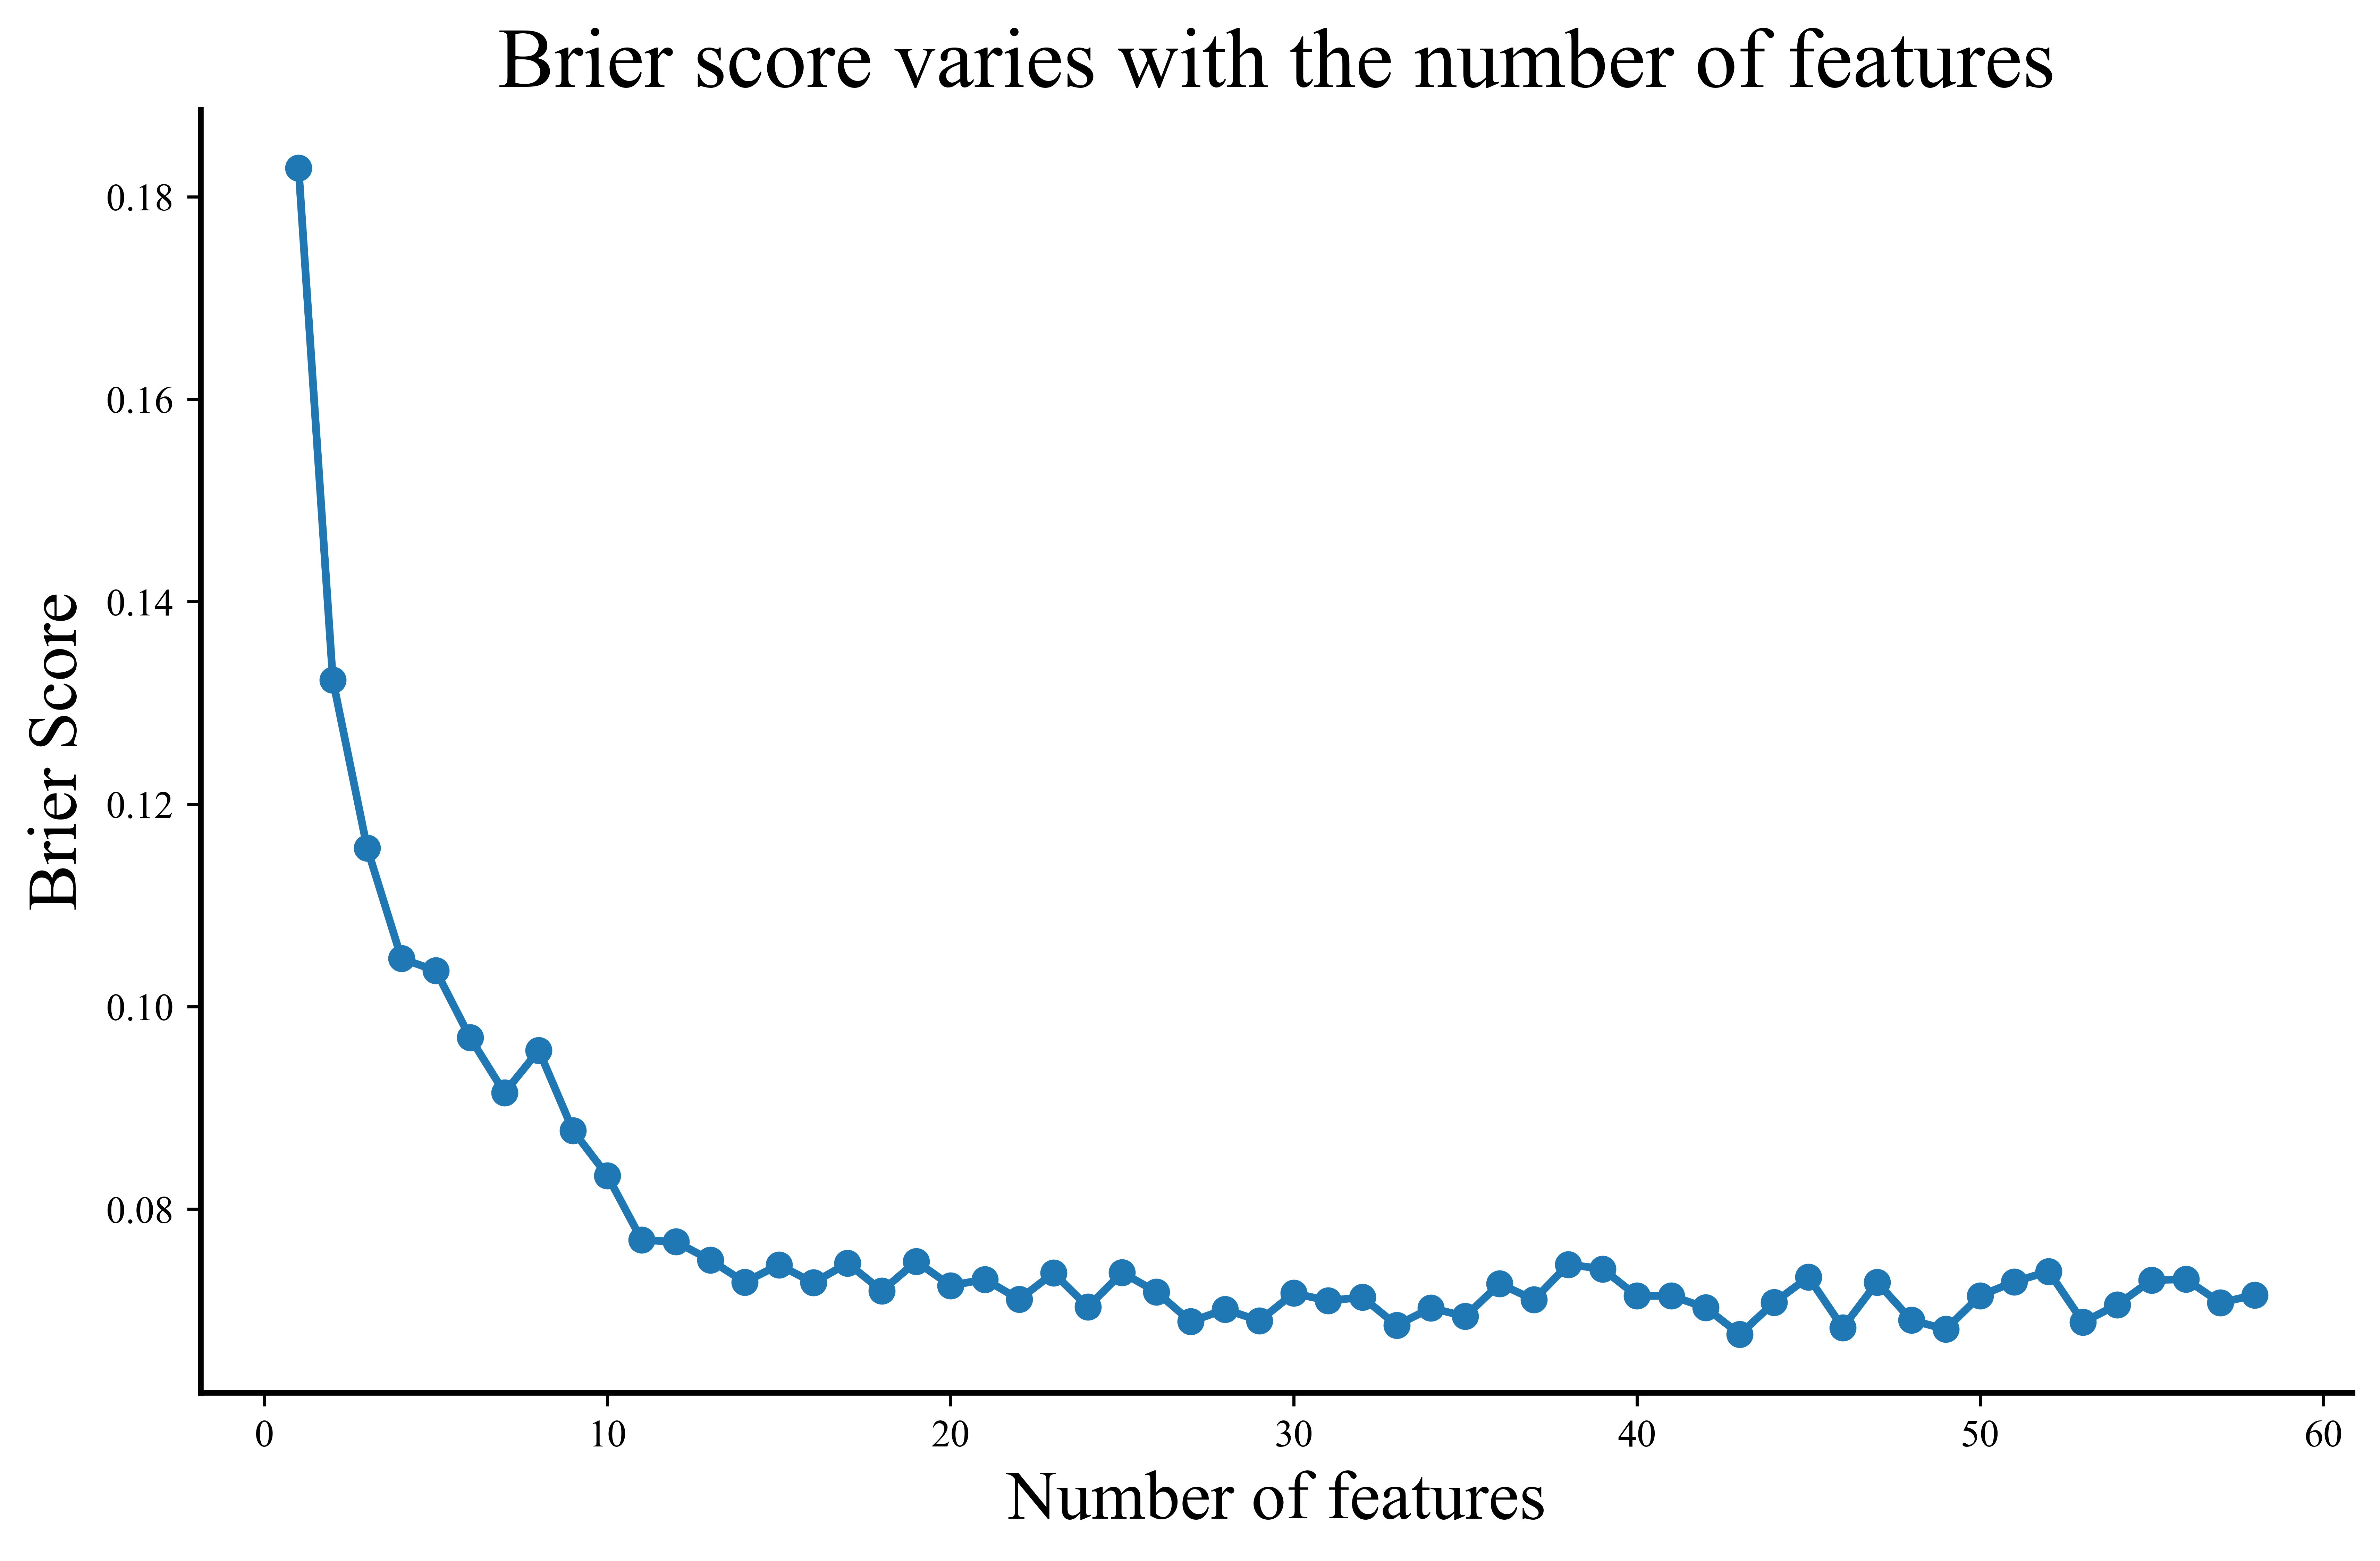 |
| --- |

**Supplementary Figure S4** Brier scores for LightGBM model with different number of features.

| 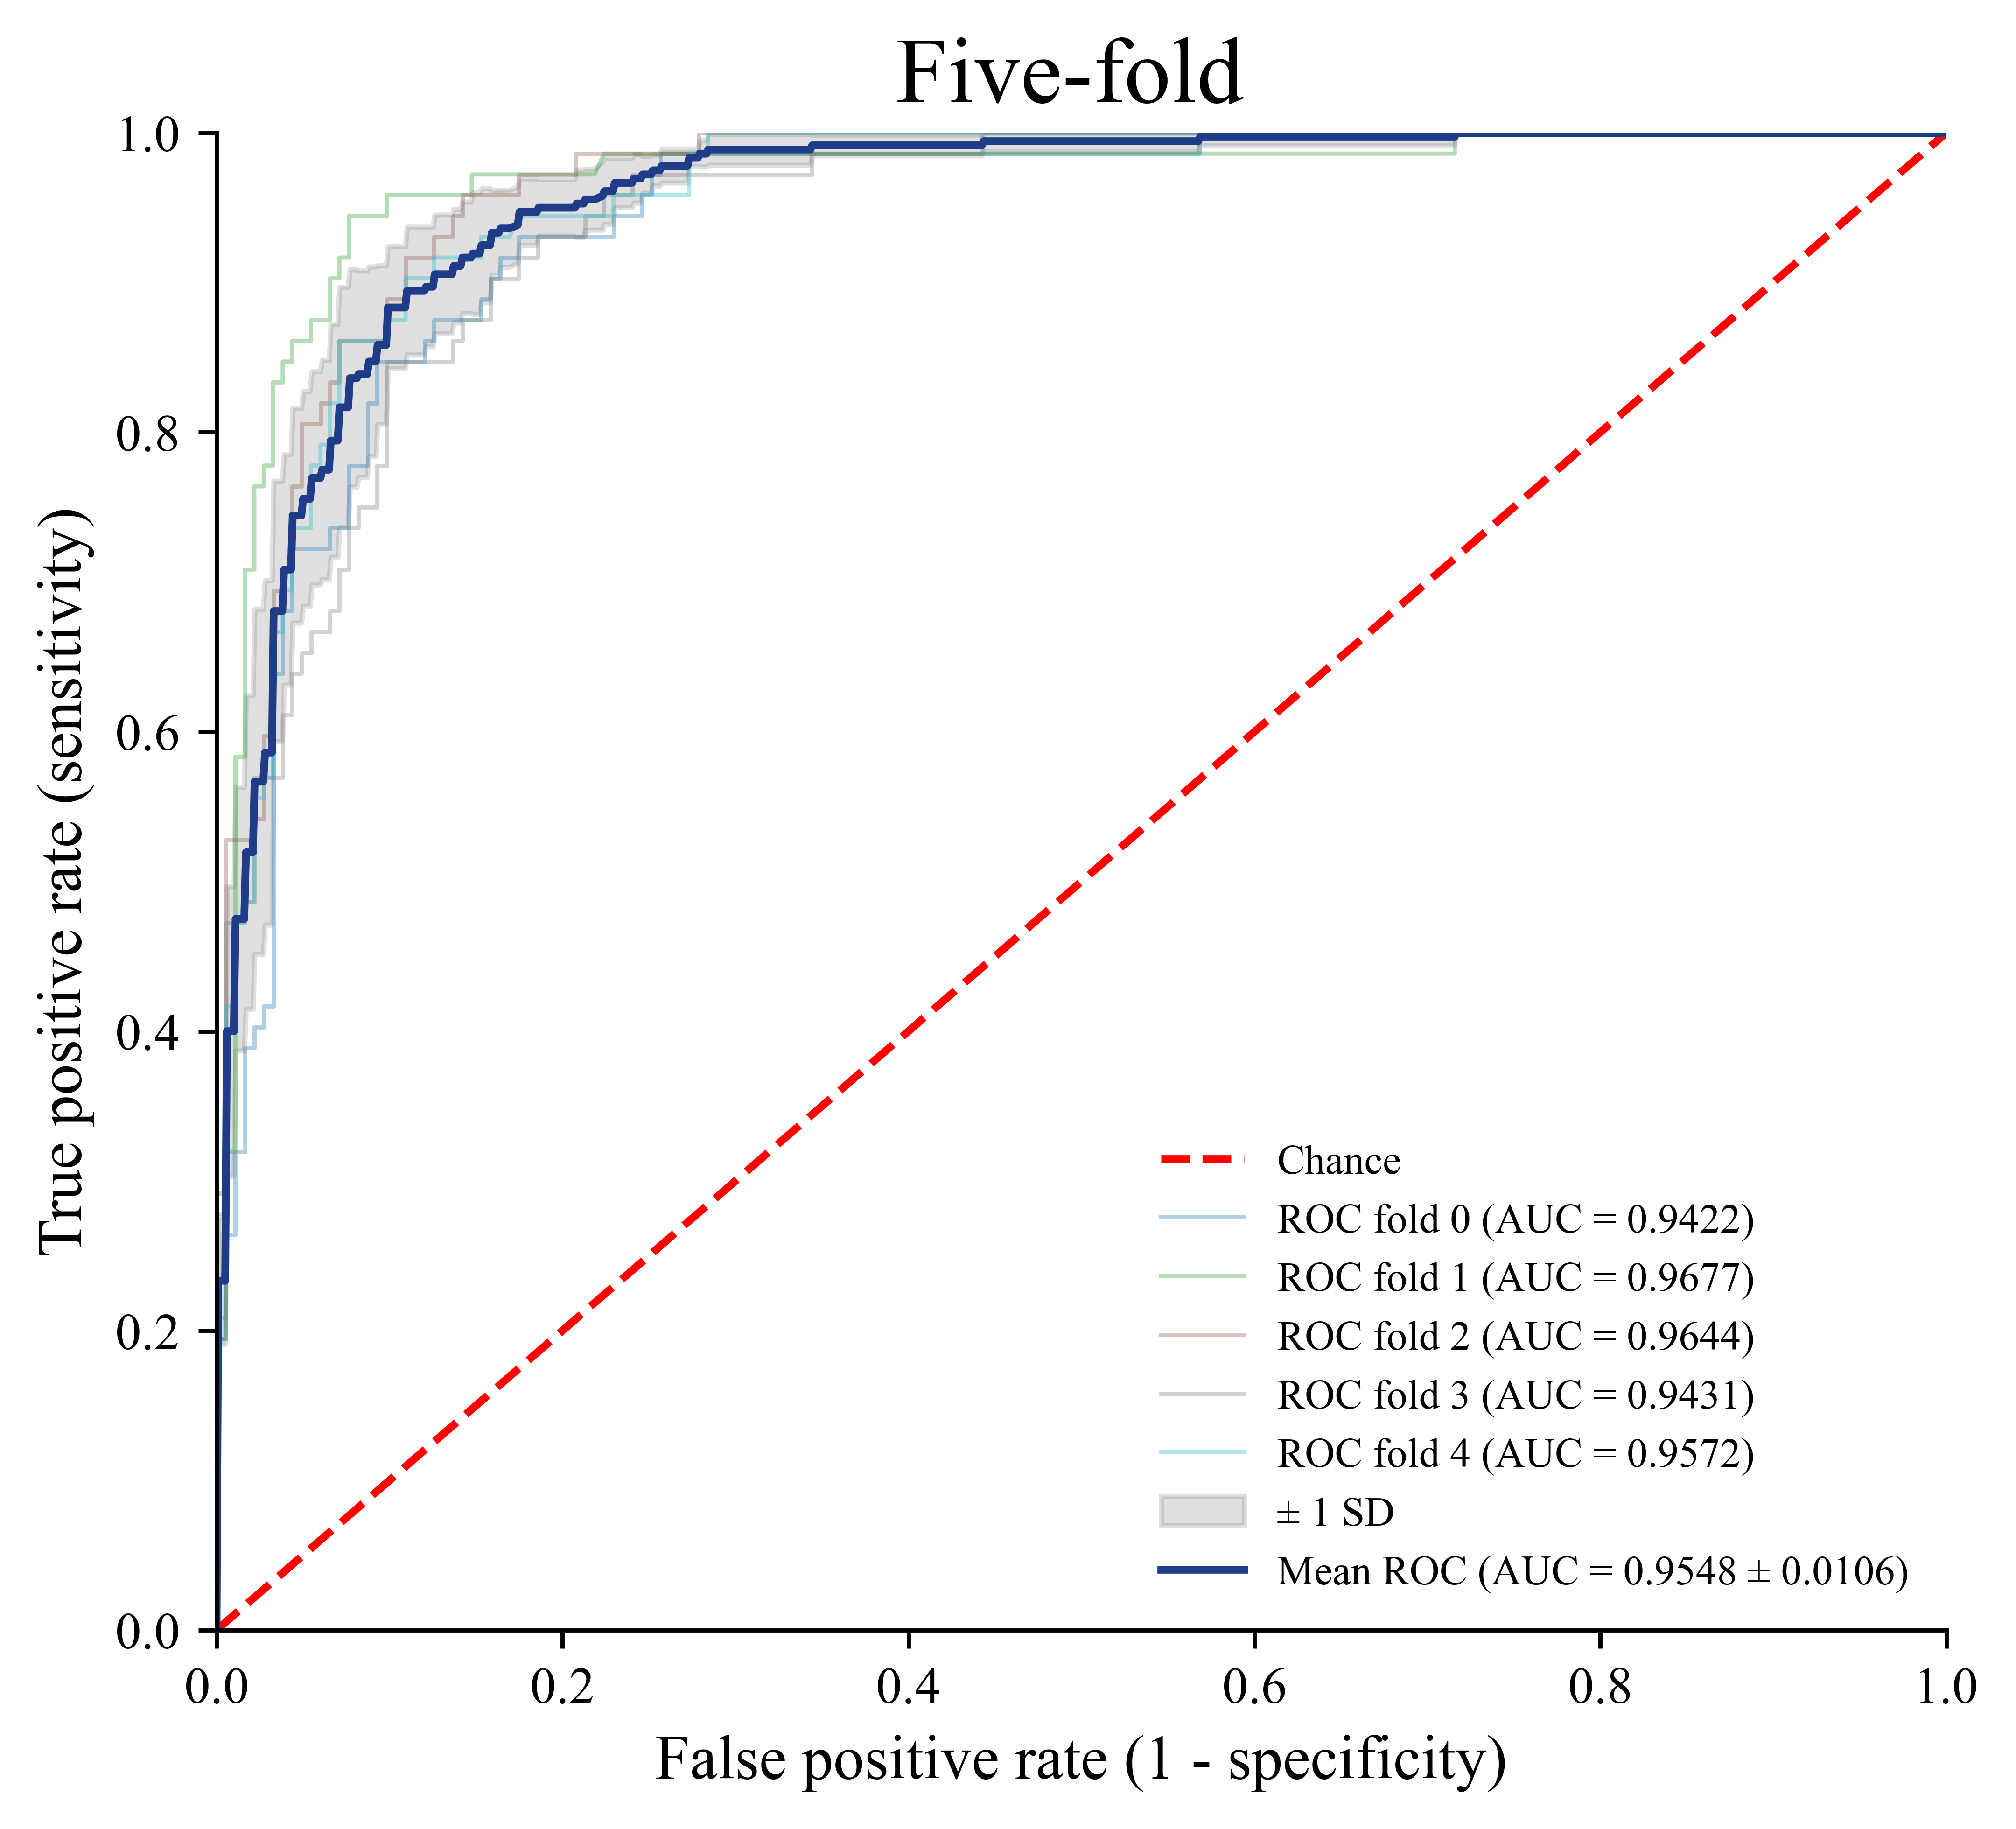 | 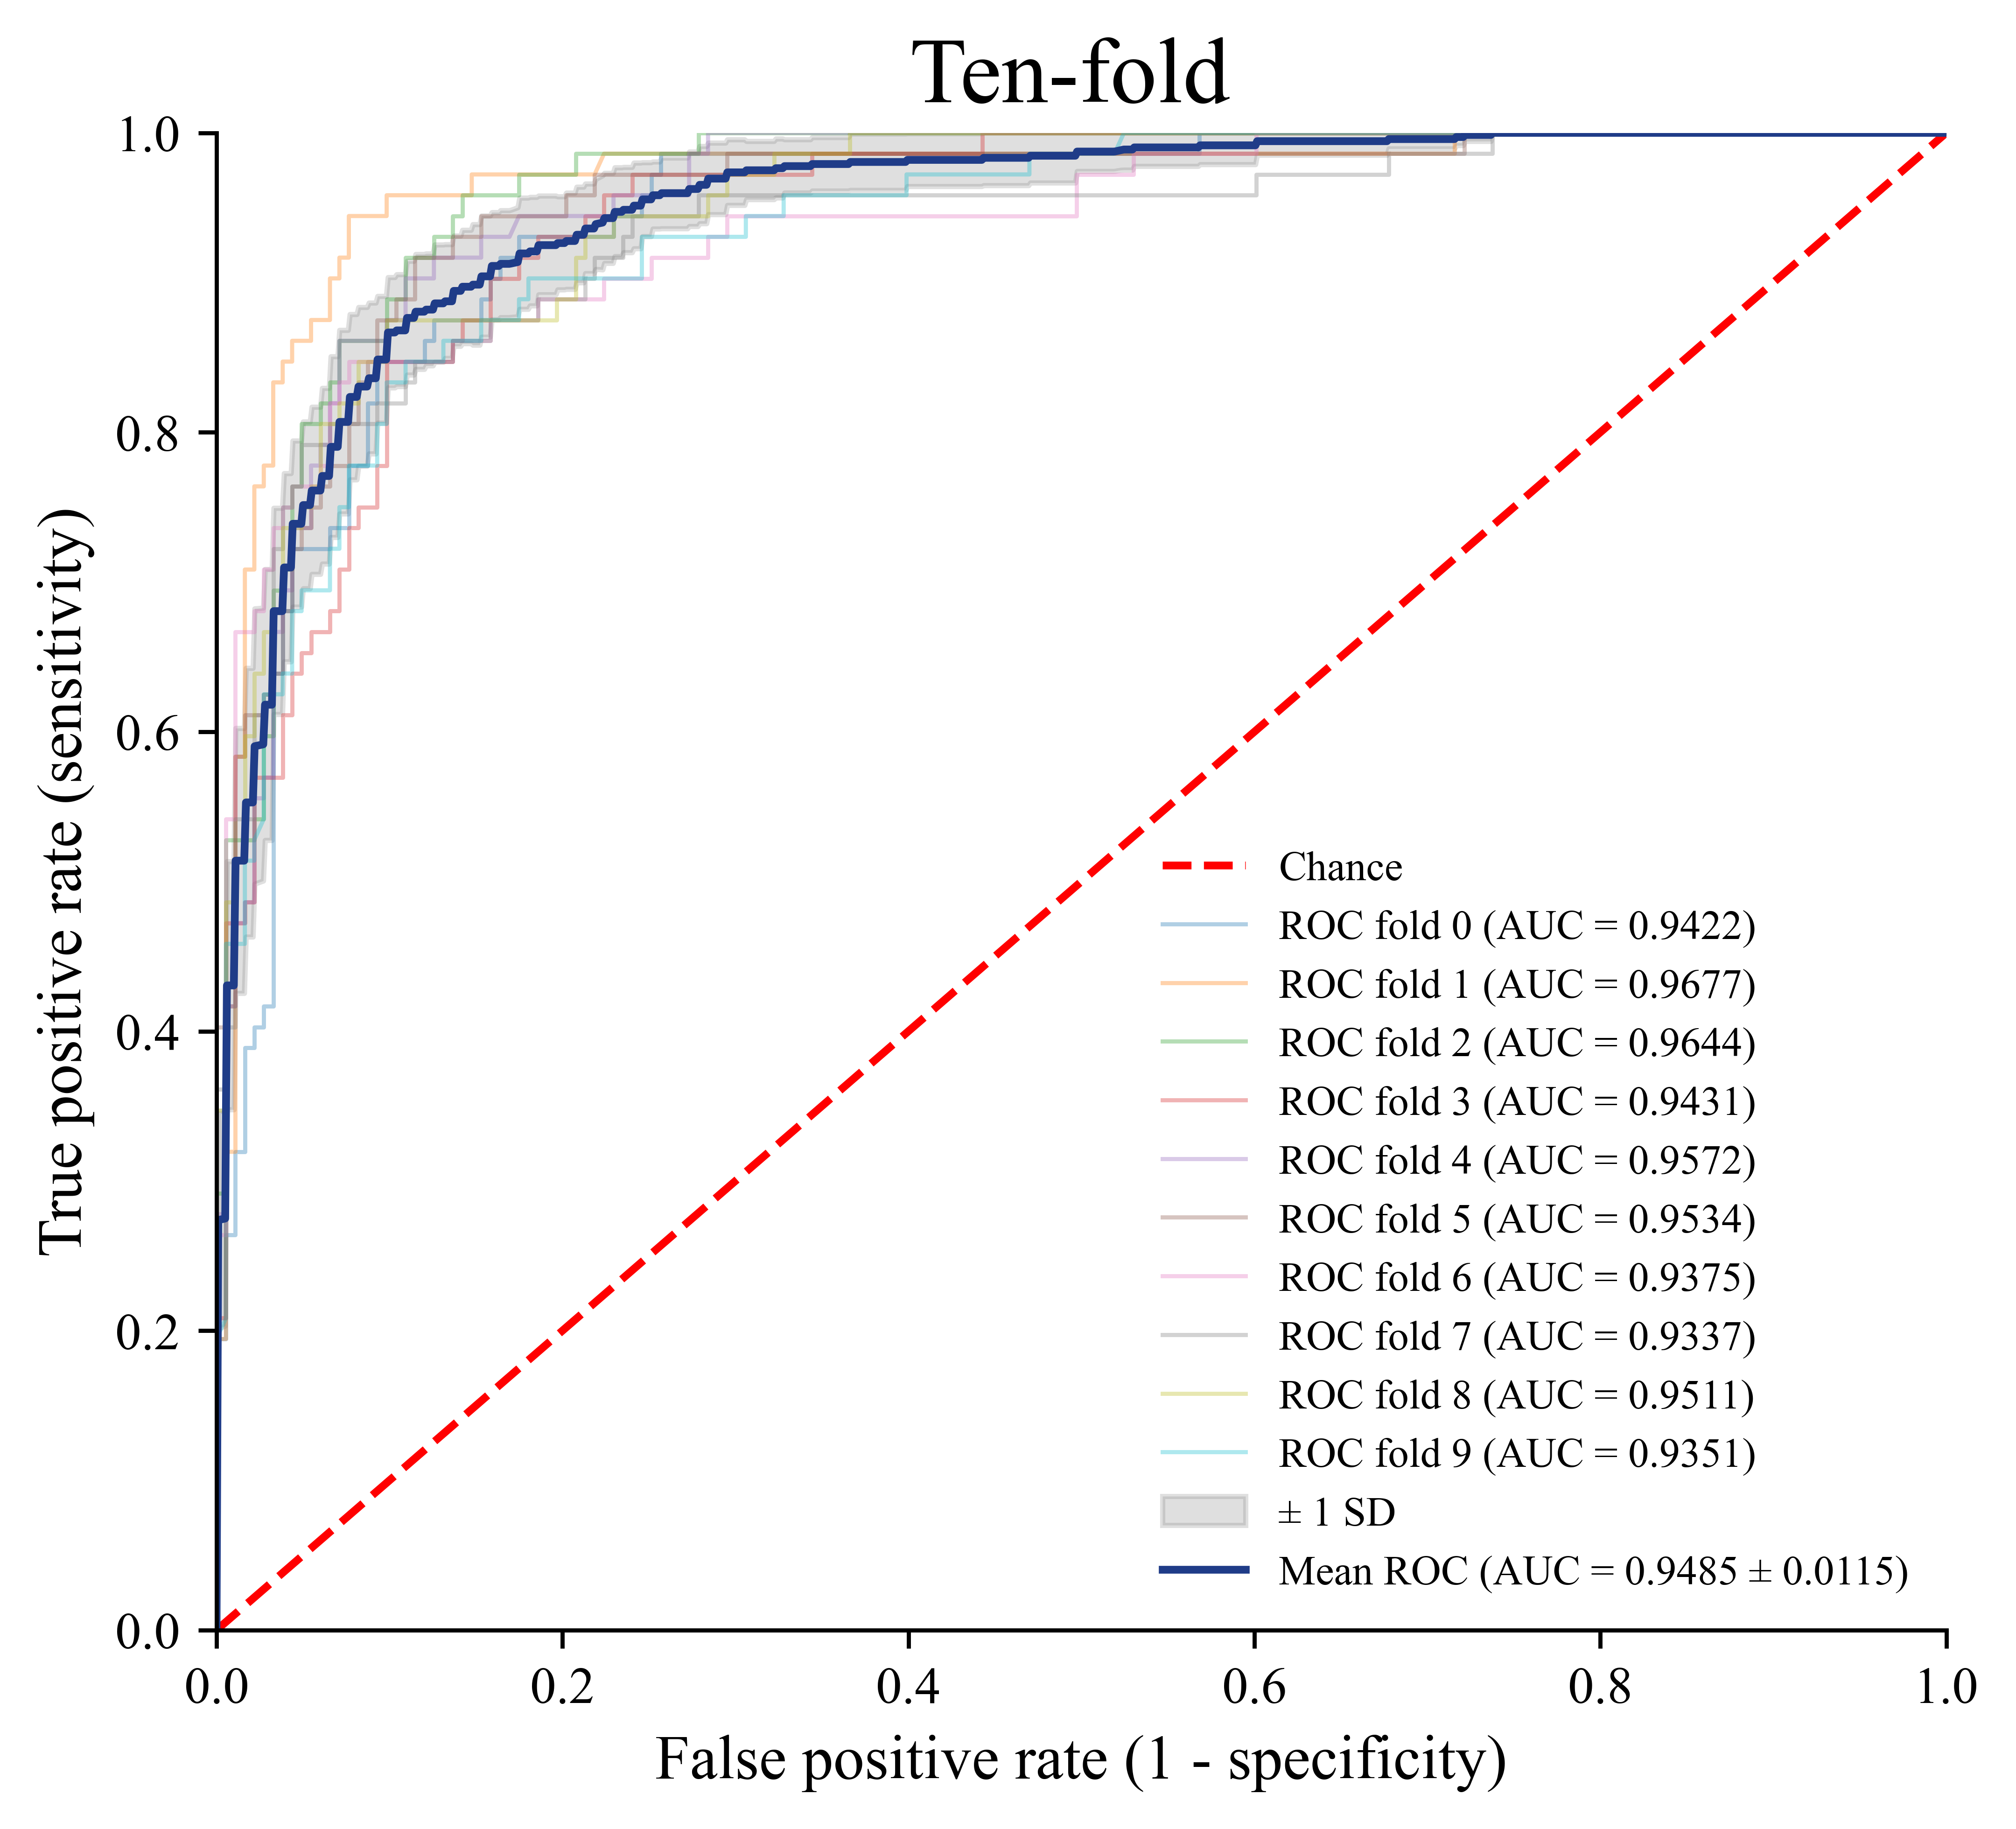 |
| --- | --- |
| (A) | (B) |

**Supplementary Figure S5** Prediction performance of the final LightGBM model with 13 features in cross validation. (A) Five-fold (B) Ten-fold.
